# Supplementary material for: Can professional football clubs deliver a weight management programme for women: a feasibility study
Source: Springer Nature journal article supplement (doi:10.1186/s12889-018-6255-2), 2018-12-01
Supplement: MOESM1 [file 16312104]

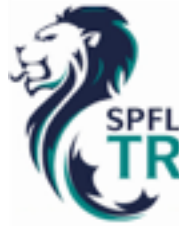

SPFL  
**TRUST** Scottish Football  
SUPPORTING COMMUNITIES

**For Women**

**FOOTBALL FANS IN TRAINING**

**Women's fitness and  
healthy living programme  
for  
Aberdeen  
Football Club Supporters**

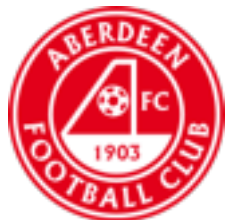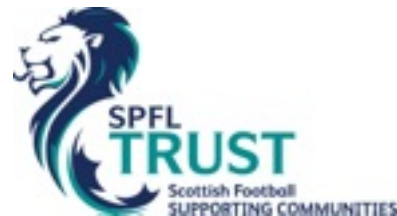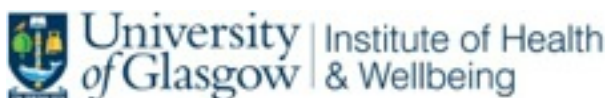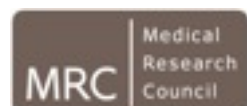

# **SELF COMPLETE QUESTIONNAIRE**

**Section A: How you heard about FFIT and  
some questions about football**

I

**We are interested in finding out how people hear about the Football Fans in Training for Women Programme AND about the club that you support:**

**Ia Can you please tell us how you found out about FFIT for Women.**

*Tick all boxes that apply:*

Saw an advert in a match programme

Saw an advert on Facebook

Heard about it on Twitter

Read about it in a **club newsletter**

Saw information about the programme **online/on a website**

Please specify which website(s)

Received an email about it

Please specify who sent the email

Heard about it from **someone else**

Please say who

**Other**

Please say what

## **Ib Can you tell us why you want to join the FFIT for Women Programme?**

To get **fitter**

To lose **weight**

To get **fitter for a specific reason**

Please specify your reason

To **improve my lifestyle**

**Health reasons**

Please specify your reason

**Someone recommended** it to me

Please specify who

**Someone told me that I needed to go on it...**

Please say who

Because it was **at the club**

Because it would be with **women like me**

**Other**

Please say what

**Which of the above reasons was the most important?**

***Please write your answer below***

**Now, some questions about football!**

**2a Which of the following football clubs do you support, if any?  
Please tick ONE box**

|                          |                                 |                          |                          |
|--------------------------|---------------------------------|--------------------------|--------------------------|
| Aberdeen                 | Celtic                          | Kilmarnock               | Motherwell               |
| <input type="checkbox"/> | <input type="checkbox"/>        | <input type="checkbox"/> | <input type="checkbox"/> |
| Rangers                  | Other (please specify opposite) |                          |                          |
| <input type="checkbox"/> | <input type="checkbox"/>        | → _____                  |                          |

**2b How far away is the home ground of the team you support from your home?  
Please tick ONE box**

|                          |                          |                          |                          |
|--------------------------|--------------------------|--------------------------|--------------------------|
| Less than a mile         | 2-3 Miles                | 4-5 Miles                | 6-10 Miles               |
| <input type="checkbox"/> | <input type="checkbox"/> | <input type="checkbox"/> | <input type="checkbox"/> |
| More than 10 Miles       |                          |                          |                          |
| <input type="checkbox"/> |                          |                          |                          |

**2c When you go to a home game of the team you support, how do you usually travel there?  
Please tick ONE box**

|                            |                          |                          |                          |
|----------------------------|--------------------------|--------------------------|--------------------------|
| Walk most / all of the way | Get the Bus              | Go by Car                | Other                    |
| <input type="checkbox"/>   | <input type="checkbox"/> | <input type="checkbox"/> | <input type="checkbox"/> |

**During the football season:**

**3a How often do you go to the HOME games of the team you support?  
Please tick ONE box**

|                          |                          |                          |                           |
|--------------------------|--------------------------|--------------------------|---------------------------|
| I go them all            | I go to most of them     | I go to some of them     | I don't go to any of them |
| <input type="checkbox"/> | <input type="checkbox"/> | <input type="checkbox"/> | <input type="checkbox"/>  |

**3b How often do you go to the AWAY games of the team you support?  
Please tick ONE box**

|                          |                          |                          |                           |
|--------------------------|--------------------------|--------------------------|---------------------------|
| I go them all            | I go to most of them     | I go to some of them     | I don't go to any of them |
| <input type="checkbox"/> | <input type="checkbox"/> | <input type="checkbox"/> | <input type="checkbox"/>  |

**3c How often do you watch live or recorded football games on TV at home with friends or family?  
Please tick ONE box**

|                          |                          |                          |                          |
|--------------------------|--------------------------|--------------------------|--------------------------|
| Every day                | 5-6 time a week          | 3-4 times a week         | 1-2 times a week         |
| <input type="checkbox"/> | <input type="checkbox"/> | <input type="checkbox"/> | <input type="checkbox"/> |
| Occasionally             | Never                    |                          |                          |
| <input type="checkbox"/> | <input type="checkbox"/> |                          |                          |

**3d How often do you go to the pub to watch a football game?  
Please tick ONE box**

|                          |                          |                          |                          |
|--------------------------|--------------------------|--------------------------|--------------------------|
| <b>Every day</b>         | <b>5-6 time a week</b>   | <b>3-4 times a week</b>  | <b>1-2 times a week</b>  |
| <input type="checkbox"/> | <input type="checkbox"/> | <input type="checkbox"/> | <input type="checkbox"/> |
| <b>Occasionally</b>      | <b>Never</b>             |                          |                          |
| <input type="checkbox"/> | <input type="checkbox"/> |                          |                          |

**4 A lot of people enjoy having a drink when watching football. How much would you drink?**

|                                                                                                                    | <b>BEER, LAGER<br/>or CIDER</b><br><i>Record number of pints</i><br>330ml bottle = ½ pint<br>500ml can = 1 pint | <b>WINE</b><br><i>Record number<br/>of glasses</i><br>1 bottle wine = 6 glasses | <b>SPIRITS</b><br><i>Record number of measures</i><br>1 bottle spirits = 27 measures<br>¼ bottle = 7 measures | <b>OTHER</b><br>(specify) ✎... |
|--------------------------------------------------------------------------------------------------------------------|-----------------------------------------------------------------------------------------------------------------|---------------------------------------------------------------------------------|---------------------------------------------------------------------------------------------------------------|--------------------------------|
| <b>before and after<br/>a <u>home match</u>?</b><br>put 0 if none                                                  | ✎ ...<br><br><b>PINTS</b>                                                                                       | ✎ ...<br><br><b>GLASSES</b>                                                     | ✎ ...<br><br><b>MEASURES</b>                                                                                  | ✎ ...                          |
| <b>if you go to the<br/>pub to watch a<br/>football game?</b><br>put 0 if none                                     | ✎ ...<br><br><b>PINTS</b>                                                                                       | ✎ ...<br><br><b>GLASSES</b>                                                     | ✎ ...<br><br><b>MEASURES</b>                                                                                  | ✎ ...                          |
| <b>if you are<br/>watching a<br/>football game<br/>on TV at home<br/>or a friend's<br/>house?</b><br>put 0 if none | ✎ ...<br><br><b>PINTS</b>                                                                                       | ✎ ...<br><br><b>GLASSES</b>                                                     | ✎ ...<br><br><b>MEASURES</b>                                                                                  | ✎ ...                          |



**5 Have much have you done any of the following over the last 3 months?...**

| <i><b>Please tick ONE box on EACH line</b></i>                                                                     | <i>Not at all</i>        | <i>1-2 times a month</i> | <i>About weekly</i>      | <i>Everyday or most days</i> |
|--------------------------------------------------------------------------------------------------------------------|--------------------------|--------------------------|--------------------------|------------------------------|
| a tried to limit what you eat or drink to try to lose weight?                                                      | <input type="checkbox"/> | <input type="checkbox"/> | <input type="checkbox"/> | <input type="checkbox"/>     |
| b done an exercise workout (including video/DVD workouts) at home?                                                 | <input type="checkbox"/> | <input type="checkbox"/> | <input type="checkbox"/> | <input type="checkbox"/>     |
| c attended a commercial weight loss programme (e.g. Weight Watchers)                                               | <input type="checkbox"/> | <input type="checkbox"/> | <input type="checkbox"/> | <input type="checkbox"/>     |
| d attended a gym, leisure centre or local sport facility to swim or take part in other physical activity sessions? | <input type="checkbox"/> | <input type="checkbox"/> | <input type="checkbox"/> | <input type="checkbox"/>     |
| e attended a weight-reduction clinic at your GP surgery or another NHS setting?                                    | <input type="checkbox"/> | <input type="checkbox"/> | <input type="checkbox"/> | <input type="checkbox"/>     |

**6 Is there anything else you have done over the last 3 months to try to lose weight ? ...**

**Please tick ONE box**

Yes

**If yes, please specify**  \_\_\_\_\_

No

**Section B: Questions about your health and wellbeing, eating patterns, activity levels and about you.**

We are interested in finding out about the kinds of physical activities that people do as part of their everyday lives. The questions will ask you about the time you spent being physically active in the **LAST 7 DAYS**. Please think about the activities you do at work, as part of your house and garden work, to get from place to place, and in your spare time for recreation, exercise or sport.

**Please answer each question even if you do not consider yourself to be an active person.**

Please think about the activities you do as part of everyday life and only those you did for at least 10 minutes at one time.

**I During the LAST 7 DAYS, on how many days did you do vigorous physical activities like heavy lifting, digging, aerobics or fast bicycling?**

Think only of activities that you did for at least 10 minutes at one time and that took hard physical effort and made you breathe much harder than normal.

Write in days per week or tick if none.

**A** \_\_\_\_\_ days per week (Go to B ↓)

or none  Go to ↓ Question 2

**B How much time in total did you usually spend on one of those days doing vigorous physical activities?**

Write in hours & minutes EACH DAY or tick if don't know/not sure

\_\_\_\_\_ hours \_\_\_\_\_ minutes

or  don't know/not sure

**2 During the LAST 7 DAYS, on how many days did you do moderate physical activities like carrying light loads, bicycling at a regular pace, or doubles tennis? Do not include walking.**

Think only of activities that you did for at least 10 minutes at one time and that took moderate physical effort and made you breathe somewhat harder than normal.

Write in days per week or tick if none

**A** \_\_\_\_\_ days per week (Go to B ↓)

or none  Go to Question 3 →

**B How much time in total did you usually spend on one of those days doing moderate physical activities?**

Write in hours & minutes EACH DAY or tick if don't know/not sure

\_\_\_\_\_ hours \_\_\_\_\_ minutes

or  don't know/not sure

**3 During the LAST 7 DAYS, on how many days did you walk for at least 10 minutes at a time? This includes walking at work and at home, walking to travel from place to place, and any other walking that you did solely for recreation, sport, exercise or leisure.**

Write in days per week or tick if none

**A \_\_\_\_\_ days per week (Go to B↓)**

or none  **Go to Question 4 ↓**

**B How much time in total did you usually spend walking on one of those days?**

Write in hours & minutes ON ONE OF THOSE DAYS or tick if don't know/not sure

\_\_\_\_\_ hours \_\_\_\_\_ minutes

or  don't know/not sure

The next question is about the time you spent sitting on weekdays while at work, at home, while doing course work and during leisure time. This includes time spent sitting at a desk, visiting friends, reading travelling on a bus or sitting or lying down to watch television.

**4 During the LAST 7 DAYS, how much time in total did you usually spend sitting on a week day?**

Write in hours & minutes ON ONE OF THOSE DAYS or tick if don't know/not sure

\_\_\_\_\_ hours \_\_\_\_\_ minutes

or  don't know/not sure

**5 Comparing yourself with most people your age, would you rate your level of fitness as...** Please tick ONE box

|                          |                          |                          |                          |                          |
|--------------------------|--------------------------|--------------------------|--------------------------|--------------------------|
| very good                | good                     | moderate                 | poor                     | very poor                |
| <input type="checkbox"/> | <input type="checkbox"/> | <input type="checkbox"/> | <input type="checkbox"/> | <input type="checkbox"/> |

**6 Please tick one box on each line below to show whether you strongly agree, agree, disagree or strongly disagree with each statement.**

Please tick ONE box on EACH LINE

|    |                                                                            | Strongly Agree           | Agree                    | Disagree                 | Strongly Disagree        |
|----|----------------------------------------------------------------------------|--------------------------|--------------------------|--------------------------|--------------------------|
| 1  | On the whole, I am satisfied with myself.                                  | <input type="checkbox"/> | <input type="checkbox"/> | <input type="checkbox"/> | <input type="checkbox"/> |
| 2  | At times, I think I am no good at all.                                     | <input type="checkbox"/> | <input type="checkbox"/> | <input type="checkbox"/> | <input type="checkbox"/> |
| 3  | I feel that I have a number of good qualities.                             | <input type="checkbox"/> | <input type="checkbox"/> | <input type="checkbox"/> | <input type="checkbox"/> |
| 4  | I am able to do things as well as most other people.                       | <input type="checkbox"/> | <input type="checkbox"/> | <input type="checkbox"/> | <input type="checkbox"/> |
| 5  | I feel I do not have much to be proud of.                                  | <input type="checkbox"/> | <input type="checkbox"/> | <input type="checkbox"/> | <input type="checkbox"/> |
| 6  | I certainly feel useless at times.                                         | <input type="checkbox"/> | <input type="checkbox"/> | <input type="checkbox"/> | <input type="checkbox"/> |
| 7  | I feel that I'm a person of worth, at least on an equal plane with others. | <input type="checkbox"/> | <input type="checkbox"/> | <input type="checkbox"/> | <input type="checkbox"/> |
| 8  | I wish I could have more respect for myself.                               | <input type="checkbox"/> | <input type="checkbox"/> | <input type="checkbox"/> | <input type="checkbox"/> |
| 9  | All in all, I am inclined to feel that I am a failure.                     | <input type="checkbox"/> | <input type="checkbox"/> | <input type="checkbox"/> | <input type="checkbox"/> |
| 10 | I take a positive attitude toward myself.                                  | <input type="checkbox"/> | <input type="checkbox"/> | <input type="checkbox"/> | <input type="checkbox"/> |

**THE NEXT FEW QUESTIONS ASK ABOUT YOUR HEALTH**

**7** In general, would you say your health is:  
Please tick ONE box

|                          |                          |                          |                          |                          |
|--------------------------|--------------------------|--------------------------|--------------------------|--------------------------|
| Excellent                | Very Good                | Good                     | Fair                     | Poor                     |
| <input type="checkbox"/> | <input type="checkbox"/> | <input type="checkbox"/> | <input type="checkbox"/> | <input type="checkbox"/> |

**8** Does this normally limit your activities in any way?  
Please tick ONE box

|                          |                          |                            |                          |                          |
|--------------------------|--------------------------|----------------------------|--------------------------|--------------------------|
| a very<br>great deal     | quite<br>a lot           | to a<br>moderate<br>degree | only<br>a little         | not<br>at all            |
| <input type="checkbox"/> | <input type="checkbox"/> | <input type="checkbox"/>   | <input type="checkbox"/> | <input type="checkbox"/> |

**THE FOLLOWING TWO QUESTIONS ARE ABOUT  
ACTIVITIES YOU MIGHT DO DURING A TYPICAL DAY**

**Does YOUR HEALTH NOW LIMIT YOU in these activities?  
If so, how much?**

**9A MODERATE ACTIVITIES, such as moving a table, pushing a vacuum cleaner, bowling, or playing golf:**  
Please tick ONE box

|                       |                          |                          |                          |                           |                          |
|-----------------------|--------------------------|--------------------------|--------------------------|---------------------------|--------------------------|
| Yes, limited<br>a lot | <input type="checkbox"/> | Yes, limited<br>a little | <input type="checkbox"/> | No, not<br>limited at all | <input type="checkbox"/> |
|-----------------------|--------------------------|--------------------------|--------------------------|---------------------------|--------------------------|

**9B Climbing SEVERAL flights of stairs:**

Please tick ONE box

Yes, limited  
a lot

Yes, limited  
a little

No, not  
limited at all

3

**10 During the PAST 4 WEEKS have you had any of the following problems with your work or other regular activities AS A RESULT OF YOUR PHYSICAL HEALTH?**

Please tick ONE box for each question

|                                                      | Yes                      | No                       |
|------------------------------------------------------|--------------------------|--------------------------|
| ACCOMPLISHED LESS than you would like                | <input type="checkbox"/> | <input type="checkbox"/> |
| Were limited in the KIND of work or other activities | <input type="checkbox"/> | <input type="checkbox"/> |

**11 During the PAST 4 WEEKS, have you had any of the following problems with your work or other regular daily activities AS A RESULT OF ANY EMOTIONAL PROBLEMS (such as feeling depressed or anxious)?**

Please tick ONE box for each question

|                                                          | Yes                      | No                       |
|----------------------------------------------------------|--------------------------|--------------------------|
| ACCOMPLISHED LESS than you would like                    | <input type="checkbox"/> | <input type="checkbox"/> |
| Didn't do work or other activities as CAREFULLY as usual | <input type="checkbox"/> | <input type="checkbox"/> |

**12 During the PAST 4 WEEKS, how much did PAIN interfere with your normal work (including both work outside the home and housework)?**

Please tick ONE box

| Not At All               | A Little Bit             | Moderately               | Quite a Bit              | Extremely                |
|--------------------------|--------------------------|--------------------------|--------------------------|--------------------------|
| <input type="checkbox"/> | <input type="checkbox"/> | <input type="checkbox"/> | <input type="checkbox"/> | <input type="checkbox"/> |





**15 Now, thinking about yourself and how you normally feel, to what extent do you generally feel....**

Please one box on each line

|            | 1<br>(never)             | 2                        | 3                        | 4                        | 5<br>(always)            |
|------------|--------------------------|--------------------------|--------------------------|--------------------------|--------------------------|
| Upset      | <input type="checkbox"/> | <input type="checkbox"/> | <input type="checkbox"/> | <input type="checkbox"/> | <input type="checkbox"/> |
| Hostile    | <input type="checkbox"/> | <input type="checkbox"/> | <input type="checkbox"/> | <input type="checkbox"/> | <input type="checkbox"/> |
| Alert      | <input type="checkbox"/> | <input type="checkbox"/> | <input type="checkbox"/> | <input type="checkbox"/> | <input type="checkbox"/> |
| Ashamed    | <input type="checkbox"/> | <input type="checkbox"/> | <input type="checkbox"/> | <input type="checkbox"/> | <input type="checkbox"/> |
| Inspired   | <input type="checkbox"/> | <input type="checkbox"/> | <input type="checkbox"/> | <input type="checkbox"/> | <input type="checkbox"/> |
| Nervous    | <input type="checkbox"/> | <input type="checkbox"/> | <input type="checkbox"/> | <input type="checkbox"/> | <input type="checkbox"/> |
| Determined | <input type="checkbox"/> | <input type="checkbox"/> | <input type="checkbox"/> | <input type="checkbox"/> | <input type="checkbox"/> |
| Attentive  | <input type="checkbox"/> | <input type="checkbox"/> | <input type="checkbox"/> | <input type="checkbox"/> | <input type="checkbox"/> |
| Afraid     | <input type="checkbox"/> | <input type="checkbox"/> | <input type="checkbox"/> | <input type="checkbox"/> | <input type="checkbox"/> |
| Active     | <input type="checkbox"/> | <input type="checkbox"/> | <input type="checkbox"/> | <input type="checkbox"/> | <input type="checkbox"/> |

**16 Please look at the list of NHS Services below.**

Please tick NO or YES. If you tick 'yes' for any of the services, please give the number of times you have used the service in the LAST 3 MONTHS.

The example shows: 3 visits to the Dentist in last 3 months.

**OVER THE LAST 3 MONTHS, have you used any of the following NHS Services?**

|                                                                |                             |                                         | Number of visits |                                                   |
|----------------------------------------------------------------|-----------------------------|-----------------------------------------|------------------|---------------------------------------------------|
| EXAMPLE: Dentist                                               | No <input type="checkbox"/> | Yes <input checked="" type="checkbox"/> | →                | 3                                                 |
| Your GP or another GP                                          | No <input type="checkbox"/> | Yes <input type="checkbox"/>            | →                | <input type="checkbox"/> <input type="checkbox"/> |
| Nurse                                                          | No <input type="checkbox"/> | Yes <input type="checkbox"/>            | →                | <input type="checkbox"/> <input type="checkbox"/> |
| Physiotherapist - outpatient                                   | No <input type="checkbox"/> | Yes <input type="checkbox"/>            | →                | <input type="checkbox"/> <input type="checkbox"/> |
| Doctor or nurse in an emergency department<br>(casualty / A&E) | No <input type="checkbox"/> | Yes <input type="checkbox"/>            | →                | <input type="checkbox"/> <input type="checkbox"/> |

**Hospital specialist – outpatient (please specify)**

|                      |                             |                              | Number of visits |                                                   |
|----------------------|-----------------------------|------------------------------|------------------|---------------------------------------------------|
| <input type="text"/> | No <input type="checkbox"/> | Yes <input type="checkbox"/> | →                | <input type="checkbox"/> <input type="checkbox"/> |
| <input type="text"/> | No <input type="checkbox"/> | Yes <input type="checkbox"/> | →                | <input type="checkbox"/> <input type="checkbox"/> |
| <input type="text"/> | No <input type="checkbox"/> | Yes <input type="checkbox"/> | →                | <input type="checkbox"/> <input type="checkbox"/> |

---

Hospital inpatient stay (*please specify*)

 ...

No  Yes  → Number of visits

 ...

No  Yes  →

 ...

No  Yes  →

---

Other NHS Service (*please specify*)

 ...

No  Yes  → Number of visits

 ...

No  Yes  →

 ...

No  Yes  →

**17 In the LAST 3 MONTHS, please tell us if you have used any of these medications - either prescribed for you by a doctor or bought (by you or someone else on your behalf) without a prescription?**

The example shows: Your Doctor had prescribed you eye drops ONCE and you also bought eye drops from the Chemist or other shops another FIVE times in the last 3 months.

| In the LAST 3 MONTHS...                        | DOCTOR PRESCRIBED              |                                                                                  | BOUGHT WITHOUT A PRESCRIPTION<br>(by you or someone else)<br>from a Chemist or other shop |                                                                                  |
|------------------------------------------------|--------------------------------|----------------------------------------------------------------------------------|-------------------------------------------------------------------------------------------|----------------------------------------------------------------------------------|
|                                                | Number of times                |                                                                                  | Number of times                                                                           |                                                                                  |
| <i>EXAMPLE: Eye drops</i>                      | No<br><input type="checkbox"/> | Yes <input checked="" type="checkbox"/> → 3                                      | No<br><input type="checkbox"/>                                                            | Yes <input checked="" type="checkbox"/> → 1                                      |
| <b>Pain killers</b>                            | No<br><input type="checkbox"/> | Yes <input type="checkbox"/> → <input type="checkbox"/> <input type="checkbox"/> | No<br><input type="checkbox"/>                                                            | Yes <input type="checkbox"/> → <input type="checkbox"/> <input type="checkbox"/> |
| <b>Anti-inflammatory drugs (eg: ibuprofen)</b> | No<br><input type="checkbox"/> | Yes <input type="checkbox"/> → <input type="checkbox"/> <input type="checkbox"/> | No<br><input type="checkbox"/>                                                            | Yes <input type="checkbox"/> → <input type="checkbox"/> <input type="checkbox"/> |
| <b>Gels / creams (eg: ibuleve)</b>             | No<br><input type="checkbox"/> | Yes <input type="checkbox"/> → <input type="checkbox"/> <input type="checkbox"/> | No<br><input type="checkbox"/>                                                            | Yes <input type="checkbox"/> → <input type="checkbox"/> <input type="checkbox"/> |
| <b>Inhalers for asthma</b>                     | No<br><input type="checkbox"/> | Yes <input type="checkbox"/> → <input type="checkbox"/> <input type="checkbox"/> | No<br><input type="checkbox"/>                                                            | Yes <input type="checkbox"/> → <input type="checkbox"/> <input type="checkbox"/> |
| <b>Sleeping pills</b>                          | No<br><input type="checkbox"/> | Yes <input type="checkbox"/> → <input type="checkbox"/> <input type="checkbox"/> | No<br><input type="checkbox"/>                                                            | Yes <input type="checkbox"/> → <input type="checkbox"/> <input type="checkbox"/> |
| <b>Anti-depressants</b>                        | No<br><input type="checkbox"/> | Yes <input type="checkbox"/> → <input type="checkbox"/> <input type="checkbox"/> | No<br><input type="checkbox"/>                                                            | Yes <input type="checkbox"/> → <input type="checkbox"/> <input type="checkbox"/> |

**18 Are you taking any other medications?**

No

Yes

Go to Q20 ↓ Go to Q19 ↓

**19 If 'Yes', please write the name(s) of the medications below and indicate the number of times that this has been prescribed or bought for you IN THE LAST 3 MONTHS.**

| In the LAST 3 MONTHS... | DOCTOR PRESCRIBED           |                                                                                  | BOUGHT WITHOUT A PRESCRIPTION<br>(by you or someone else)<br>from a Chemist or other shop |                                                                                  |
|-------------------------|-----------------------------|----------------------------------------------------------------------------------|-------------------------------------------------------------------------------------------|----------------------------------------------------------------------------------|
|                         | No                          | Yes                                                                              | No                                                                                        | Yes                                                                              |
|                         | Number of times             |                                                                                  | Number of times                                                                           |                                                                                  |
| <input type="text"/>    | No <input type="checkbox"/> | Yes <input type="checkbox"/> → <input type="checkbox"/> <input type="checkbox"/> | No <input type="checkbox"/>                                                               | Yes <input type="checkbox"/> → <input type="checkbox"/> <input type="checkbox"/> |
| <input type="text"/>    | No <input type="checkbox"/> | Yes <input type="checkbox"/> → <input type="checkbox"/> <input type="checkbox"/> | No <input type="checkbox"/>                                                               | Yes <input type="checkbox"/> → <input type="checkbox"/> <input type="checkbox"/> |
| <input type="text"/>    | No <input type="checkbox"/> | Yes <input type="checkbox"/> → <input type="checkbox"/> <input type="checkbox"/> | No <input type="checkbox"/>                                                               | Yes <input type="checkbox"/> → <input type="checkbox"/> <input type="checkbox"/> |
| <input type="text"/>    | No <input type="checkbox"/> | Yes <input type="checkbox"/> → <input type="checkbox"/> <input type="checkbox"/> | No <input type="checkbox"/>                                                               | Yes <input type="checkbox"/> → <input type="checkbox"/> <input type="checkbox"/> |
| <input type="text"/>    | No <input type="checkbox"/> | Yes <input type="checkbox"/> → <input type="checkbox"/> <input type="checkbox"/> | No <input type="checkbox"/>                                                               | Yes <input type="checkbox"/> → <input type="checkbox"/> <input type="checkbox"/> |
| <input type="text"/>    | No <input type="checkbox"/> | Yes <input type="checkbox"/> → <input type="checkbox"/> <input type="checkbox"/> | No <input type="checkbox"/>                                                               | Yes <input type="checkbox"/> → <input type="checkbox"/> <input type="checkbox"/> |

**20 Below you will find a number of words or phrases which might describe someone's personality. We would like you to tell us how well each of the words describe you**

*Use the seven point scale to show us how well each word describes you.*

Example: if the word was FRIENDLY

Write 6 in the box if it is usually true that you are friendly →

FRIENDLY

**REMEMBER TO FILL IN A BOX FOR EVERY WORD OR PHRASE**

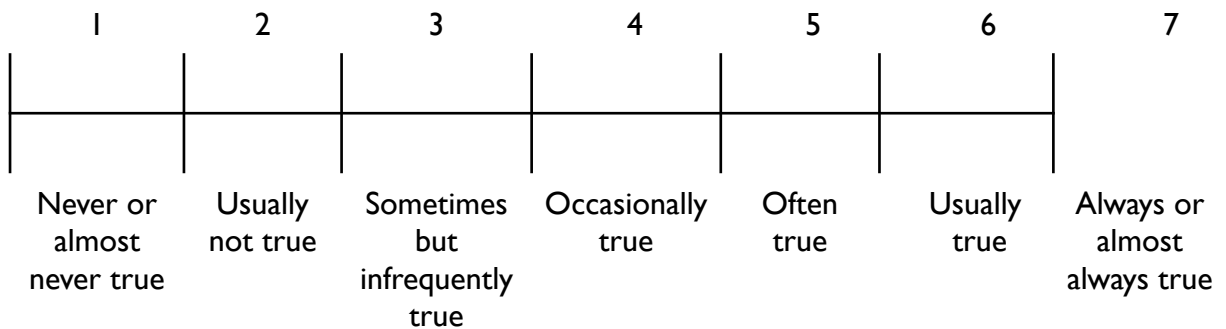

- |                              |                      |                               |                      |
|------------------------------|----------------------|-------------------------------|----------------------|
| DEFEND MY OWN BELIEFS        | <input type="text"/> | HAVE LEADERSHIP ABILITIES     | <input type="text"/> |
| AFFECTIONATE                 | <input type="text"/> | EAGER TO SOOTHE HURT FEELINGS | <input type="text"/> |
| CONSCIENTIOUS                | <input type="text"/> | SECRETIVE                     | <input type="text"/> |
| INDEPENDENT                  | <input type="text"/> | WILLING TO TAKE RISKS         | <input type="text"/> |
| SYMPATHETIC                  | <input type="text"/> | WARM                          | <input type="text"/> |
| MOODY                        | <input type="text"/> | ADAPTABLE                     | <input type="text"/> |
| ASSERTIVE                    | <input type="text"/> | DOMINANT                      | <input type="text"/> |
| SENSITIVE TO NEEDS OF OTHERS | <input type="text"/> | TENDER                        | <input type="text"/> |
| RELIABLE                     | <input type="text"/> | CONCEITED                     | <input type="text"/> |
| STRONG PERSONALITY           | <input type="text"/> | WILLING TO TAKE A STAND       | <input type="text"/> |
| UNDERSTANDING                | <input type="text"/> | LOVE CHILDREN                 | <input type="text"/> |
| JEALOUS                      | <input type="text"/> | TACTFUL                       | <input type="text"/> |
| FORCEFUL                     | <input type="text"/> | AGGRESSIVE                    | <input type="text"/> |
| COMPASSIONATE                | <input type="text"/> | GENTLE                        | <input type="text"/> |
| TRUTHFUL                     | <input type="text"/> | CONVENTIONAL                  | <input type="text"/> |

The next section looks at what you may have eaten and drunk over the **LAST 7 DAYS**. Please read each question carefully, ticking appropriate box for each option.

**21 About how many times OVER THE LAST 7 DAYS did you eat breakfast?**

| No times                 | 1-2 times                | 3-5 times                | 6 or more times          |
|--------------------------|--------------------------|--------------------------|--------------------------|
| <input type="checkbox"/> | <input type="checkbox"/> | <input type="checkbox"/> | <input type="checkbox"/> |

**22 About how many times OVER THE LAST 7 DAYS did you eat/drink a serving of the following?**

|                                                            | No times                 | 1-2 times                | 3-5 times                | 6 or more times          |
|------------------------------------------------------------|--------------------------|--------------------------|--------------------------|--------------------------|
| <b>Cheese</b><br><i>(any except cottage)</i>               | <input type="checkbox"/> | <input type="checkbox"/> | <input type="checkbox"/> | <input type="checkbox"/> |
| <b>Beef burgers or sausages</b>                            | <input type="checkbox"/> | <input type="checkbox"/> | <input type="checkbox"/> | <input type="checkbox"/> |
| <b>Beef, pork or lamb</b><br><i>(if vegetarian: nuts)</i>  | <input type="checkbox"/> | <input type="checkbox"/> | <input type="checkbox"/> | <input type="checkbox"/> |
| <b>Fried food</b><br><i>(fried fish, cooked breakfast)</i> | <input type="checkbox"/> | <input type="checkbox"/> | <input type="checkbox"/> | <input type="checkbox"/> |
| <b>Chips</b>                                               | <input type="checkbox"/> | <input type="checkbox"/> | <input type="checkbox"/> | <input type="checkbox"/> |
| <b>Bacon, processed meat</b>                               | <input type="checkbox"/> | <input type="checkbox"/> | <input type="checkbox"/> | <input type="checkbox"/> |
| <b>Pies, quiches, pastries</b>                             | <input type="checkbox"/> | <input type="checkbox"/> | <input type="checkbox"/> | <input type="checkbox"/> |
| <b>Crisps</b>                                              | <input type="checkbox"/> | <input type="checkbox"/> | <input type="checkbox"/> | <input type="checkbox"/> |
| <b>Fast foods</b><br><i>(takeaway or sit in)</i>           | <input type="checkbox"/> | <input type="checkbox"/> | <input type="checkbox"/> | <input type="checkbox"/> |

**23 Thinking about THE LAST 7 DAYS: about how many times a day did you eat the following:**

|                                                                     | Less than once a day     | 1-2 times a day          | 3-5 times a day          | 6 or more times a day    |
|---------------------------------------------------------------------|--------------------------|--------------------------|--------------------------|--------------------------|
| <b>Fruit and vegetables</b><br>(not potatoes)                       | <input type="checkbox"/> | <input type="checkbox"/> | <input type="checkbox"/> | <input type="checkbox"/> |
| <b>Chocolate, sweets</b>                                            | <input type="checkbox"/> | <input type="checkbox"/> | <input type="checkbox"/> | <input type="checkbox"/> |
| <b>Biscuits</b>                                                     | <input type="checkbox"/> | <input type="checkbox"/> | <input type="checkbox"/> | <input type="checkbox"/> |
| <b>Sugary drinks</b><br>(fizzy drinks, diluting juice, fruit juice) | <input type="checkbox"/> | <input type="checkbox"/> | <input type="checkbox"/> | <input type="checkbox"/> |

**24 Thinking about THE LAST 7 DAYS: about how much milk did you use in a day, for drinking or in cereal, tea or coffee.**

| Less than a quarter pint | About a quarter pint     | About half a pint        | 1 pint or more           |
|--------------------------|--------------------------|--------------------------|--------------------------|
| <input type="checkbox"/> | <input type="checkbox"/> | <input type="checkbox"/> | <input type="checkbox"/> |

**25 What kind of milk do you usually use?**

| Full cream (blue top)    | Semi skimmed (green top) | Skimmed (red top)        |
|--------------------------|--------------------------|--------------------------|
| <input type="checkbox"/> | <input type="checkbox"/> | <input type="checkbox"/> |



**Thinking about THE LAST 7 DAYS:**  
**how much alcohol have you had to drink each day.**

**26 A** Please circle which day is **TODAY**

Mon      Tues      Wed      Thurs      Fri      Sat      Sun

**26 B** Starting with yesterday and work back through the week, record the number of pints, glasses etc you had each day.

|           | RECORD IN PINTS        |  | RECORD IN GLASSES<br>1 bottle wine = 6 glasses<br>1 bottle sherry = 12 glasses |                   | RECORD IN MEASURES<br>1 bottle spirits = 27 measures<br>1/4 bottle = 7 measures |                    |
|-----------|------------------------|--|--------------------------------------------------------------------------------|-------------------|---------------------------------------------------------------------------------|--------------------|
|           | BEER<br>LAGER<br>CIDER |  | WINE                                                                           | FORTIFIED<br>WINE | SPIRITS                                                                         | OTHER<br>(specify) |
|           | PINTS                  |  | GLASSES                                                                        | GLASSES           | MEASURES                                                                        |                    |
| MONDAY    |                        |  |                                                                                |                   |                                                                                 |                    |
| TUESDAY   |                        |  |                                                                                |                   |                                                                                 |                    |
| WEDNESDAY |                        |  |                                                                                |                   |                                                                                 |                    |
| THURSDAY  |                        |  |                                                                                |                   |                                                                                 |                    |
| FRIDAY    |                        |  |                                                                                |                   |                                                                                 |                    |
| SATURDAY  |                        |  |                                                                                |                   |                                                                                 |                    |
| SUNDAY    |                        |  |                                                                                |                   |                                                                                 |                    |

**27A** Have you ever smoked cigarettes?

2

3

1

If yes, how many do you usually smoke per day? \_\_\_\_\_

**27B Do you ever smoke...?**

Cigars

Pipe

**This last section asks you for a few details about you and your current circumstances. This is so that we can see how women who take part in the FFIT for Women programme compare with all other women in Scotland.**

**28** How old are you?   years old  
 ...

**29** Are you?

- single, that is never married  1
- married and living with husband  2
- married but separated from husband  3
- living with someone as a couple (but not married)  4
- divorced  5
- widowed  6

**30 Are you living in a home which you...?**

Own outright

Are buying with the help of a mortgage or loan

Pay part rent and part mortgage (shared ownership)

Rent

Live rent free  
(including rent free in relative's/friend's property)

Other (please specify and tick)

DATA ENTRY CODE

**31 What is your highest educational qualification?**

No educational qualifications

Standard grades, O grades, O levels, GCE/GCSEs

Highers, advanced highers, A levels

Vocational qualification (e.g. SVQ/SCOTVEC)

HNC/HND

Degree (e.g. BA, BSc)

Post-graduate qualification (e.g. MSc, PhD)

Other (please specify and tick)

DATA ENTRY CODE

32 **Which ethnic background do you consider yourself to belong to?**  
Please tick ONE box

**White**

British

Scottish

Irish

Any other white background

**Mixed**

White and Black Caribbean

White and Black African

White and Asian

Any other Mixed background

**Asian or Asian British**

Indian

Pakistani

Bangladeshi

Any other Asian background

**Black or Black British**

Caribbean

African

Any other Black background

**Chinese or other ethnic group:**

Chinese

Any other (please tick and specify below)

.....  
.....

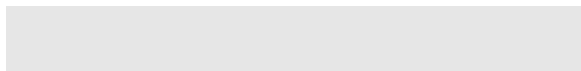

**33 Which of these descriptions best describes what you were doing last week?**

Please tick ONE box

In paid employment or self-employed (or temporarily away)

Doing unpaid work for a business that you own, or that a relative owns

Waiting to take up paid work already obtained

On a Government scheme for employment training

Looking for paid work or a Government training scheme

Intending to look for work but prevented by temporary sickness or injury

Permanently unable to work because of long-term sickness or disability

Going to college full-time (including on holiday)

Retired from paid work

Looking after home or family

Doing something else (please specify and tick)

DATA ENTRY CODE

**Thank you for completing these questions  
A researcher will now help you complete the  
few next questions and measurements**

### 34 Food Portion Station

Ask the man to look at the pictures and decide which portion most resembles what he currently eats. Record the number of the portion (1-8) against each type of food listed.

|                                                      |                                                                                          |                                                                                          |                                                    |
|------------------------------------------------------|------------------------------------------------------------------------------------------|------------------------------------------------------------------------------------------|----------------------------------------------------|
| <p><b>Cheese</b><br/>⇒</p> <p><b>Pasta</b><br/>⇒</p> | <div style="border: 1px solid black; height: 100px; width: 80px; margin: 0 auto;"></div> | <div style="border: 1px solid black; height: 100px; width: 80px; margin: 0 auto;"></div> | <p><b>Meat</b><br/>⇒</p> <p><b>Chips</b><br/>⇒</p> |
|------------------------------------------------------|------------------------------------------------------------------------------------------|------------------------------------------------------------------------------------------|----------------------------------------------------|

**35 ASK:** do you have a long-standing illness, disability or infirmity?  
By long-standing we mean anything that has troubled you over a period of time or that is likely to affect you over a period of time?

Yes

No

**36** What is the matter with you?

Does this normally limit your activities in any way?

Please tick **one** box for **each** listed condition

*(write BRIEF description of all LONG-STANDING conditions mentioned)*

|                   |             |                      |               |            |
|-------------------|-------------|----------------------|---------------|------------|
| A very great deal | Quite a lot | To a moderate degree | Only a little | Not at all |
|-------------------|-------------|----------------------|---------------|------------|

|         |                          |                          |                          |                          |                          |
|---------|--------------------------|--------------------------|--------------------------|--------------------------|--------------------------|
| 1 ⇒ ... | <input type="checkbox"/> | <input type="checkbox"/> | <input type="checkbox"/> | <input type="checkbox"/> | <input type="checkbox"/> |
| 2 ⇒ ... | <input type="checkbox"/> | <input type="checkbox"/> | <input type="checkbox"/> | <input type="checkbox"/> | <input type="checkbox"/> |
| 3 ⇒ ... | <input type="checkbox"/> | <input type="checkbox"/> | <input type="checkbox"/> | <input type="checkbox"/> | <input type="checkbox"/> |
| 4 ⇒ ... | <input type="checkbox"/> | <input type="checkbox"/> | <input type="checkbox"/> | <input type="checkbox"/> | <input type="checkbox"/> |

# 37 INJURIES

**37a** Do you have any current or past injuries that affect your ability to undertake usual activities or exercise?

Please tick **one** box

Yes  → **Q37b**

1

No  → **check**

2

**37b** How many injuries affect your activities?

Please tick **one** box

If more than 3, record 3 most limiting injuries

**1**  provide details @ injury 1

**2**  provide details @ injury 1 & 2

**3+**  provide details @ injury 1, 2 & 3

|                                                                                                                 | Injury 1 ↓                                                                                                                                                                                                                                                                                                                                                                                                                                                             | Injury 2 ↓                                       | Injury 3 ↓     |                |                                                    |                |                |                                       |                |                                                                                                                                 |                                                                                                                                                                                                                                                                                                        |                    |                |                                                                                                                                                                                                                                                                                                                                                                                                                                                  |                                                  |                |                                                                                                                                                                                                                                                                                                                                                                                                                                                                        |                                                    |                                                                                                                                 |                |                                                                                                                                                                                                                                                                                                        |                    |                |                      |                            |                |                                                                                                                                                                                                                                                                                                                                                                                                                                                  |                                                  |                |                 |                                                    |                |                                                                                                                                                                                                                                                                                                                                                                                                                                                                        |                                       |                |                |                                      |                |                |                      |                |                |                          |                |                |                 |                |                |
|-----------------------------------------------------------------------------------------------------------------|------------------------------------------------------------------------------------------------------------------------------------------------------------------------------------------------------------------------------------------------------------------------------------------------------------------------------------------------------------------------------------------------------------------------------------------------------------------------|--------------------------------------------------|----------------|----------------|----------------------------------------------------|----------------|----------------|---------------------------------------|----------------|---------------------------------------------------------------------------------------------------------------------------------|--------------------------------------------------------------------------------------------------------------------------------------------------------------------------------------------------------------------------------------------------------------------------------------------------------|--------------------|----------------|--------------------------------------------------------------------------------------------------------------------------------------------------------------------------------------------------------------------------------------------------------------------------------------------------------------------------------------------------------------------------------------------------------------------------------------------------|--------------------------------------------------|----------------|------------------------------------------------------------------------------------------------------------------------------------------------------------------------------------------------------------------------------------------------------------------------------------------------------------------------------------------------------------------------------------------------------------------------------------------------------------------------|----------------------------------------------------|---------------------------------------------------------------------------------------------------------------------------------|----------------|--------------------------------------------------------------------------------------------------------------------------------------------------------------------------------------------------------------------------------------------------------------------------------------------------------|--------------------|----------------|----------------------|----------------------------|----------------|--------------------------------------------------------------------------------------------------------------------------------------------------------------------------------------------------------------------------------------------------------------------------------------------------------------------------------------------------------------------------------------------------------------------------------------------------|--------------------------------------------------|----------------|-----------------|----------------------------------------------------|----------------|------------------------------------------------------------------------------------------------------------------------------------------------------------------------------------------------------------------------------------------------------------------------------------------------------------------------------------------------------------------------------------------------------------------------------------------------------------------------|---------------------------------------|----------------|----------------|--------------------------------------|----------------|----------------|----------------------|----------------|----------------|--------------------------|----------------|----------------|-----------------|----------------|----------------|
| <b>Brief description of injury</b>                                                                              |                                                                                                                                                                                                                                                                                                                                                                                                                                                                        |                                                  |                |                |                                                    |                |                |                                       |                |                                                                                                                                 |                                                                                                                                                                                                                                                                                                        |                    |                |                                                                                                                                                                                                                                                                                                                                                                                                                                                  |                                                  |                |                                                                                                                                                                                                                                                                                                                                                                                                                                                                        |                                                    |                                                                                                                                 |                |                                                                                                                                                                                                                                                                                                        |                    |                |                      |                            |                |                                                                                                                                                                                                                                                                                                                                                                                                                                                  |                                                  |                |                 |                                                    |                |                                                                                                                                                                                                                                                                                                                                                                                                                                                                        |                                       |                |                |                                      |                |                |                      |                |                |                          |                |                |                 |                |                |
| <b>What type of injury</b><br>Please circle Y/N on each line                                                    | <table border="1"> <tr><td>Break or fracture</td><td>Y<sub>1</sub></td><td>N<sub>2</sub></td></tr> <tr><td>Ligament / Cartilage / Muscle damage</td><td>Y<sub>1</sub></td><td>N<sub>2</sub></td></tr> <tr><td>Dislocation of joint</td><td>Y<sub>1</sub></td><td>N<sub>2</sub></td></tr> <tr><td>Severe bruising / sprain</td><td>Y<sub>1</sub></td><td>N<sub>2</sub></td></tr> <tr><td>Other (specify)</td><td>Y<sub>1</sub></td><td>N<sub>2</sub></td></tr> </table> | Break or fracture                                | Y <sub>1</sub> | N <sub>2</sub> | Ligament / Cartilage / Muscle damage               | Y <sub>1</sub> | N <sub>2</sub> | Dislocation of joint                  | Y <sub>1</sub> | N <sub>2</sub>                                                                                                                  | Severe bruising / sprain                                                                                                                                                                                                                                                                               | Y <sub>1</sub>     | N <sub>2</sub> | Other (specify)                                                                                                                                                                                                                                                                                                                                                                                                                                  | Y <sub>1</sub>                                   | N <sub>2</sub> | <table border="1"> <tr><td>Break or fracture</td><td>Y<sub>1</sub></td><td>N<sub>2</sub></td></tr> <tr><td>Ligament / Cartilage / Muscle damage</td><td>Y<sub>1</sub></td><td>N<sub>2</sub></td></tr> <tr><td>Dislocation of joint</td><td>Y<sub>1</sub></td><td>N<sub>2</sub></td></tr> <tr><td>Severe bruising / sprain</td><td>Y<sub>1</sub></td><td>N<sub>2</sub></td></tr> <tr><td>Other (specify)</td><td>Y<sub>1</sub></td><td>N<sub>2</sub></td></tr> </table> | Break or fracture                                  | Y <sub>1</sub>                                                                                                                  | N <sub>2</sub> | Ligament / Cartilage / Muscle damage                                                                                                                                                                                                                                                                   | Y <sub>1</sub>     | N <sub>2</sub> | Dislocation of joint | Y <sub>1</sub>             | N <sub>2</sub> | Severe bruising / sprain                                                                                                                                                                                                                                                                                                                                                                                                                         | Y <sub>1</sub>                                   | N <sub>2</sub> | Other (specify) | Y <sub>1</sub>                                     | N <sub>2</sub> | <table border="1"> <tr><td>Break or fracture</td><td>Y<sub>1</sub></td><td>N<sub>2</sub></td></tr> <tr><td>Ligament / Cartilage / Muscle damage</td><td>Y<sub>1</sub></td><td>N<sub>2</sub></td></tr> <tr><td>Dislocation of joint</td><td>Y<sub>1</sub></td><td>N<sub>2</sub></td></tr> <tr><td>Severe bruising / sprain</td><td>Y<sub>1</sub></td><td>N<sub>2</sub></td></tr> <tr><td>Other (specify)</td><td>Y<sub>1</sub></td><td>N<sub>2</sub></td></tr> </table> | Break or fracture                     | Y <sub>1</sub> | N <sub>2</sub> | Ligament / Cartilage / Muscle damage | Y <sub>1</sub> | N <sub>2</sub> | Dislocation of joint | Y <sub>1</sub> | N <sub>2</sub> | Severe bruising / sprain | Y <sub>1</sub> | N <sub>2</sub> | Other (specify) | Y <sub>1</sub> | N <sub>2</sub> |
| Break or fracture                                                                                               | Y <sub>1</sub>                                                                                                                                                                                                                                                                                                                                                                                                                                                         | N <sub>2</sub>                                   |                |                |                                                    |                |                |                                       |                |                                                                                                                                 |                                                                                                                                                                                                                                                                                                        |                    |                |                                                                                                                                                                                                                                                                                                                                                                                                                                                  |                                                  |                |                                                                                                                                                                                                                                                                                                                                                                                                                                                                        |                                                    |                                                                                                                                 |                |                                                                                                                                                                                                                                                                                                        |                    |                |                      |                            |                |                                                                                                                                                                                                                                                                                                                                                                                                                                                  |                                                  |                |                 |                                                    |                |                                                                                                                                                                                                                                                                                                                                                                                                                                                                        |                                       |                |                |                                      |                |                |                      |                |                |                          |                |                |                 |                |                |
| Ligament / Cartilage / Muscle damage                                                                            | Y <sub>1</sub>                                                                                                                                                                                                                                                                                                                                                                                                                                                         | N <sub>2</sub>                                   |                |                |                                                    |                |                |                                       |                |                                                                                                                                 |                                                                                                                                                                                                                                                                                                        |                    |                |                                                                                                                                                                                                                                                                                                                                                                                                                                                  |                                                  |                |                                                                                                                                                                                                                                                                                                                                                                                                                                                                        |                                                    |                                                                                                                                 |                |                                                                                                                                                                                                                                                                                                        |                    |                |                      |                            |                |                                                                                                                                                                                                                                                                                                                                                                                                                                                  |                                                  |                |                 |                                                    |                |                                                                                                                                                                                                                                                                                                                                                                                                                                                                        |                                       |                |                |                                      |                |                |                      |                |                |                          |                |                |                 |                |                |
| Dislocation of joint                                                                                            | Y <sub>1</sub>                                                                                                                                                                                                                                                                                                                                                                                                                                                         | N <sub>2</sub>                                   |                |                |                                                    |                |                |                                       |                |                                                                                                                                 |                                                                                                                                                                                                                                                                                                        |                    |                |                                                                                                                                                                                                                                                                                                                                                                                                                                                  |                                                  |                |                                                                                                                                                                                                                                                                                                                                                                                                                                                                        |                                                    |                                                                                                                                 |                |                                                                                                                                                                                                                                                                                                        |                    |                |                      |                            |                |                                                                                                                                                                                                                                                                                                                                                                                                                                                  |                                                  |                |                 |                                                    |                |                                                                                                                                                                                                                                                                                                                                                                                                                                                                        |                                       |                |                |                                      |                |                |                      |                |                |                          |                |                |                 |                |                |
| Severe bruising / sprain                                                                                        | Y <sub>1</sub>                                                                                                                                                                                                                                                                                                                                                                                                                                                         | N <sub>2</sub>                                   |                |                |                                                    |                |                |                                       |                |                                                                                                                                 |                                                                                                                                                                                                                                                                                                        |                    |                |                                                                                                                                                                                                                                                                                                                                                                                                                                                  |                                                  |                |                                                                                                                                                                                                                                                                                                                                                                                                                                                                        |                                                    |                                                                                                                                 |                |                                                                                                                                                                                                                                                                                                        |                    |                |                      |                            |                |                                                                                                                                                                                                                                                                                                                                                                                                                                                  |                                                  |                |                 |                                                    |                |                                                                                                                                                                                                                                                                                                                                                                                                                                                                        |                                       |                |                |                                      |                |                |                      |                |                |                          |                |                |                 |                |                |
| Other (specify)                                                                                                 | Y <sub>1</sub>                                                                                                                                                                                                                                                                                                                                                                                                                                                         | N <sub>2</sub>                                   |                |                |                                                    |                |                |                                       |                |                                                                                                                                 |                                                                                                                                                                                                                                                                                                        |                    |                |                                                                                                                                                                                                                                                                                                                                                                                                                                                  |                                                  |                |                                                                                                                                                                                                                                                                                                                                                                                                                                                                        |                                                    |                                                                                                                                 |                |                                                                                                                                                                                                                                                                                                        |                    |                |                      |                            |                |                                                                                                                                                                                                                                                                                                                                                                                                                                                  |                                                  |                |                 |                                                    |                |                                                                                                                                                                                                                                                                                                                                                                                                                                                                        |                                       |                |                |                                      |                |                |                      |                |                |                          |                |                |                 |                |                |
| Break or fracture                                                                                               | Y <sub>1</sub>                                                                                                                                                                                                                                                                                                                                                                                                                                                         | N <sub>2</sub>                                   |                |                |                                                    |                |                |                                       |                |                                                                                                                                 |                                                                                                                                                                                                                                                                                                        |                    |                |                                                                                                                                                                                                                                                                                                                                                                                                                                                  |                                                  |                |                                                                                                                                                                                                                                                                                                                                                                                                                                                                        |                                                    |                                                                                                                                 |                |                                                                                                                                                                                                                                                                                                        |                    |                |                      |                            |                |                                                                                                                                                                                                                                                                                                                                                                                                                                                  |                                                  |                |                 |                                                    |                |                                                                                                                                                                                                                                                                                                                                                                                                                                                                        |                                       |                |                |                                      |                |                |                      |                |                |                          |                |                |                 |                |                |
| Ligament / Cartilage / Muscle damage                                                                            | Y <sub>1</sub>                                                                                                                                                                                                                                                                                                                                                                                                                                                         | N <sub>2</sub>                                   |                |                |                                                    |                |                |                                       |                |                                                                                                                                 |                                                                                                                                                                                                                                                                                                        |                    |                |                                                                                                                                                                                                                                                                                                                                                                                                                                                  |                                                  |                |                                                                                                                                                                                                                                                                                                                                                                                                                                                                        |                                                    |                                                                                                                                 |                |                                                                                                                                                                                                                                                                                                        |                    |                |                      |                            |                |                                                                                                                                                                                                                                                                                                                                                                                                                                                  |                                                  |                |                 |                                                    |                |                                                                                                                                                                                                                                                                                                                                                                                                                                                                        |                                       |                |                |                                      |                |                |                      |                |                |                          |                |                |                 |                |                |
| Dislocation of joint                                                                                            | Y <sub>1</sub>                                                                                                                                                                                                                                                                                                                                                                                                                                                         | N <sub>2</sub>                                   |                |                |                                                    |                |                |                                       |                |                                                                                                                                 |                                                                                                                                                                                                                                                                                                        |                    |                |                                                                                                                                                                                                                                                                                                                                                                                                                                                  |                                                  |                |                                                                                                                                                                                                                                                                                                                                                                                                                                                                        |                                                    |                                                                                                                                 |                |                                                                                                                                                                                                                                                                                                        |                    |                |                      |                            |                |                                                                                                                                                                                                                                                                                                                                                                                                                                                  |                                                  |                |                 |                                                    |                |                                                                                                                                                                                                                                                                                                                                                                                                                                                                        |                                       |                |                |                                      |                |                |                      |                |                |                          |                |                |                 |                |                |
| Severe bruising / sprain                                                                                        | Y <sub>1</sub>                                                                                                                                                                                                                                                                                                                                                                                                                                                         | N <sub>2</sub>                                   |                |                |                                                    |                |                |                                       |                |                                                                                                                                 |                                                                                                                                                                                                                                                                                                        |                    |                |                                                                                                                                                                                                                                                                                                                                                                                                                                                  |                                                  |                |                                                                                                                                                                                                                                                                                                                                                                                                                                                                        |                                                    |                                                                                                                                 |                |                                                                                                                                                                                                                                                                                                        |                    |                |                      |                            |                |                                                                                                                                                                                                                                                                                                                                                                                                                                                  |                                                  |                |                 |                                                    |                |                                                                                                                                                                                                                                                                                                                                                                                                                                                                        |                                       |                |                |                                      |                |                |                      |                |                |                          |                |                |                 |                |                |
| Other (specify)                                                                                                 | Y <sub>1</sub>                                                                                                                                                                                                                                                                                                                                                                                                                                                         | N <sub>2</sub>                                   |                |                |                                                    |                |                |                                       |                |                                                                                                                                 |                                                                                                                                                                                                                                                                                                        |                    |                |                                                                                                                                                                                                                                                                                                                                                                                                                                                  |                                                  |                |                                                                                                                                                                                                                                                                                                                                                                                                                                                                        |                                                    |                                                                                                                                 |                |                                                                                                                                                                                                                                                                                                        |                    |                |                      |                            |                |                                                                                                                                                                                                                                                                                                                                                                                                                                                  |                                                  |                |                 |                                                    |                |                                                                                                                                                                                                                                                                                                                                                                                                                                                                        |                                       |                |                |                                      |                |                |                      |                |                |                          |                |                |                 |                |                |
| Break or fracture                                                                                               | Y <sub>1</sub>                                                                                                                                                                                                                                                                                                                                                                                                                                                         | N <sub>2</sub>                                   |                |                |                                                    |                |                |                                       |                |                                                                                                                                 |                                                                                                                                                                                                                                                                                                        |                    |                |                                                                                                                                                                                                                                                                                                                                                                                                                                                  |                                                  |                |                                                                                                                                                                                                                                                                                                                                                                                                                                                                        |                                                    |                                                                                                                                 |                |                                                                                                                                                                                                                                                                                                        |                    |                |                      |                            |                |                                                                                                                                                                                                                                                                                                                                                                                                                                                  |                                                  |                |                 |                                                    |                |                                                                                                                                                                                                                                                                                                                                                                                                                                                                        |                                       |                |                |                                      |                |                |                      |                |                |                          |                |                |                 |                |                |
| Ligament / Cartilage / Muscle damage                                                                            | Y <sub>1</sub>                                                                                                                                                                                                                                                                                                                                                                                                                                                         | N <sub>2</sub>                                   |                |                |                                                    |                |                |                                       |                |                                                                                                                                 |                                                                                                                                                                                                                                                                                                        |                    |                |                                                                                                                                                                                                                                                                                                                                                                                                                                                  |                                                  |                |                                                                                                                                                                                                                                                                                                                                                                                                                                                                        |                                                    |                                                                                                                                 |                |                                                                                                                                                                                                                                                                                                        |                    |                |                      |                            |                |                                                                                                                                                                                                                                                                                                                                                                                                                                                  |                                                  |                |                 |                                                    |                |                                                                                                                                                                                                                                                                                                                                                                                                                                                                        |                                       |                |                |                                      |                |                |                      |                |                |                          |                |                |                 |                |                |
| Dislocation of joint                                                                                            | Y <sub>1</sub>                                                                                                                                                                                                                                                                                                                                                                                                                                                         | N <sub>2</sub>                                   |                |                |                                                    |                |                |                                       |                |                                                                                                                                 |                                                                                                                                                                                                                                                                                                        |                    |                |                                                                                                                                                                                                                                                                                                                                                                                                                                                  |                                                  |                |                                                                                                                                                                                                                                                                                                                                                                                                                                                                        |                                                    |                                                                                                                                 |                |                                                                                                                                                                                                                                                                                                        |                    |                |                      |                            |                |                                                                                                                                                                                                                                                                                                                                                                                                                                                  |                                                  |                |                 |                                                    |                |                                                                                                                                                                                                                                                                                                                                                                                                                                                                        |                                       |                |                |                                      |                |                |                      |                |                |                          |                |                |                 |                |                |
| Severe bruising / sprain                                                                                        | Y <sub>1</sub>                                                                                                                                                                                                                                                                                                                                                                                                                                                         | N <sub>2</sub>                                   |                |                |                                                    |                |                |                                       |                |                                                                                                                                 |                                                                                                                                                                                                                                                                                                        |                    |                |                                                                                                                                                                                                                                                                                                                                                                                                                                                  |                                                  |                |                                                                                                                                                                                                                                                                                                                                                                                                                                                                        |                                                    |                                                                                                                                 |                |                                                                                                                                                                                                                                                                                                        |                    |                |                      |                            |                |                                                                                                                                                                                                                                                                                                                                                                                                                                                  |                                                  |                |                 |                                                    |                |                                                                                                                                                                                                                                                                                                                                                                                                                                                                        |                                       |                |                |                                      |                |                |                      |                |                |                          |                |                |                 |                |                |
| Other (specify)                                                                                                 | Y <sub>1</sub>                                                                                                                                                                                                                                                                                                                                                                                                                                                         | N <sub>2</sub>                                   |                |                |                                                    |                |                |                                       |                |                                                                                                                                 |                                                                                                                                                                                                                                                                                                        |                    |                |                                                                                                                                                                                                                                                                                                                                                                                                                                                  |                                                  |                |                                                                                                                                                                                                                                                                                                                                                                                                                                                                        |                                                    |                                                                                                                                 |                |                                                                                                                                                                                                                                                                                                        |                    |                |                      |                            |                |                                                                                                                                                                                                                                                                                                                                                                                                                                                  |                                                  |                |                 |                                                    |                |                                                                                                                                                                                                                                                                                                                                                                                                                                                                        |                                       |                |                |                                      |                |                |                      |                |                |                          |                |                |                 |                |                |
| <b>Date of injury</b>                                                                                           | <table border="1"> <tr><td> </td><td> </td><td> </td><td> </td></tr> <tr><td>M</td><td>M</td><td>Y</td><td>Y</td></tr> </table>                                                                                                                                                                                                                                                                                                                                        |                                                  |                |                |                                                    | M              | M              | Y                                     | Y              | <table border="1"> <tr><td> </td><td> </td><td> </td><td> </td></tr> <tr><td>M</td><td>M</td><td>Y</td><td>Y</td></tr> </table> |                                                                                                                                                                                                                                                                                                        |                    |                |                                                                                                                                                                                                                                                                                                                                                                                                                                                  | M                                                | M              | Y                                                                                                                                                                                                                                                                                                                                                                                                                                                                      | Y                                                  | <table border="1"> <tr><td> </td><td> </td><td> </td><td> </td></tr> <tr><td>M</td><td>M</td><td>Y</td><td>Y</td></tr> </table> |                |                                                                                                                                                                                                                                                                                                        |                    |                | M                    | M                          | Y              | Y                                                                                                                                                                                                                                                                                                                                                                                                                                                |                                                  |                |                 |                                                    |                |                                                                                                                                                                                                                                                                                                                                                                                                                                                                        |                                       |                |                |                                      |                |                |                      |                |                |                          |                |                |                 |                |                |
|                                                                                                                 |                                                                                                                                                                                                                                                                                                                                                                                                                                                                        |                                                  |                |                |                                                    |                |                |                                       |                |                                                                                                                                 |                                                                                                                                                                                                                                                                                                        |                    |                |                                                                                                                                                                                                                                                                                                                                                                                                                                                  |                                                  |                |                                                                                                                                                                                                                                                                                                                                                                                                                                                                        |                                                    |                                                                                                                                 |                |                                                                                                                                                                                                                                                                                                        |                    |                |                      |                            |                |                                                                                                                                                                                                                                                                                                                                                                                                                                                  |                                                  |                |                 |                                                    |                |                                                                                                                                                                                                                                                                                                                                                                                                                                                                        |                                       |                |                |                                      |                |                |                      |                |                |                          |                |                |                 |                |                |
| M                                                                                                               | M                                                                                                                                                                                                                                                                                                                                                                                                                                                                      | Y                                                | Y              |                |                                                    |                |                |                                       |                |                                                                                                                                 |                                                                                                                                                                                                                                                                                                        |                    |                |                                                                                                                                                                                                                                                                                                                                                                                                                                                  |                                                  |                |                                                                                                                                                                                                                                                                                                                                                                                                                                                                        |                                                    |                                                                                                                                 |                |                                                                                                                                                                                                                                                                                                        |                    |                |                      |                            |                |                                                                                                                                                                                                                                                                                                                                                                                                                                                  |                                                  |                |                 |                                                    |                |                                                                                                                                                                                                                                                                                                                                                                                                                                                                        |                                       |                |                |                                      |                |                |                      |                |                |                          |                |                |                 |                |                |
|                                                                                                                 |                                                                                                                                                                                                                                                                                                                                                                                                                                                                        |                                                  |                |                |                                                    |                |                |                                       |                |                                                                                                                                 |                                                                                                                                                                                                                                                                                                        |                    |                |                                                                                                                                                                                                                                                                                                                                                                                                                                                  |                                                  |                |                                                                                                                                                                                                                                                                                                                                                                                                                                                                        |                                                    |                                                                                                                                 |                |                                                                                                                                                                                                                                                                                                        |                    |                |                      |                            |                |                                                                                                                                                                                                                                                                                                                                                                                                                                                  |                                                  |                |                 |                                                    |                |                                                                                                                                                                                                                                                                                                                                                                                                                                                                        |                                       |                |                |                                      |                |                |                      |                |                |                          |                |                |                 |                |                |
| M                                                                                                               | M                                                                                                                                                                                                                                                                                                                                                                                                                                                                      | Y                                                | Y              |                |                                                    |                |                |                                       |                |                                                                                                                                 |                                                                                                                                                                                                                                                                                                        |                    |                |                                                                                                                                                                                                                                                                                                                                                                                                                                                  |                                                  |                |                                                                                                                                                                                                                                                                                                                                                                                                                                                                        |                                                    |                                                                                                                                 |                |                                                                                                                                                                                                                                                                                                        |                    |                |                      |                            |                |                                                                                                                                                                                                                                                                                                                                                                                                                                                  |                                                  |                |                 |                                                    |                |                                                                                                                                                                                                                                                                                                                                                                                                                                                                        |                                       |                |                |                                      |                |                |                      |                |                |                          |                |                |                 |                |                |
|                                                                                                                 |                                                                                                                                                                                                                                                                                                                                                                                                                                                                        |                                                  |                |                |                                                    |                |                |                                       |                |                                                                                                                                 |                                                                                                                                                                                                                                                                                                        |                    |                |                                                                                                                                                                                                                                                                                                                                                                                                                                                  |                                                  |                |                                                                                                                                                                                                                                                                                                                                                                                                                                                                        |                                                    |                                                                                                                                 |                |                                                                                                                                                                                                                                                                                                        |                    |                |                      |                            |                |                                                                                                                                                                                                                                                                                                                                                                                                                                                  |                                                  |                |                 |                                                    |                |                                                                                                                                                                                                                                                                                                                                                                                                                                                                        |                                       |                |                |                                      |                |                |                      |                |                |                          |                |                |                 |                |                |
| M                                                                                                               | M                                                                                                                                                                                                                                                                                                                                                                                                                                                                      | Y                                                | Y              |                |                                                    |                |                |                                       |                |                                                                                                                                 |                                                                                                                                                                                                                                                                                                        |                    |                |                                                                                                                                                                                                                                                                                                                                                                                                                                                  |                                                  |                |                                                                                                                                                                                                                                                                                                                                                                                                                                                                        |                                                    |                                                                                                                                 |                |                                                                                                                                                                                                                                                                                                        |                    |                |                      |                            |                |                                                                                                                                                                                                                                                                                                                                                                                                                                                  |                                                  |                |                 |                                                    |                |                                                                                                                                                                                                                                                                                                                                                                                                                                                                        |                                       |                |                |                                      |                |                |                      |                |                |                          |                |                |                 |                |                |
| <b>Location of injury</b><br>Please circle Y/N on each line                                                     | <table border="1"> <tr><td>Lower Limbs<br/>Hip, Knee, Leg, Ankle, Foot, Toes</td><td>Y<sub>1</sub></td><td>N<sub>2</sub></td></tr> <tr><td>Upper Limbs<br/>Shoulder, Arm, Elbow, Hand, Fingers</td><td>Y<sub>1</sub></td><td>N<sub>2</sub></td></tr> <tr><td>Torso/ Upper body<br/>Back, Neck, Ribs</td><td>Y<sub>1</sub></td><td>N<sub>2</sub></td></tr> <tr><td>Other (specify)</td><td>Y<sub>1</sub></td><td>N<sub>2</sub></td></tr> </table>                       | Lower Limbs<br>Hip, Knee, Leg, Ankle, Foot, Toes | Y <sub>1</sub> | N <sub>2</sub> | Upper Limbs<br>Shoulder, Arm, Elbow, Hand, Fingers | Y <sub>1</sub> | N <sub>2</sub> | Torso/ Upper body<br>Back, Neck, Ribs | Y <sub>1</sub> | N <sub>2</sub>                                                                                                                  | Other (specify)                                                                                                                                                                                                                                                                                        | Y <sub>1</sub>     | N <sub>2</sub> | <table border="1"> <tr><td>Lower Limbs<br/>Hip, Knee, Leg, Ankle, Foot, Toes</td><td>Y<sub>1</sub></td><td>N<sub>2</sub></td></tr> <tr><td>Upper Limbs<br/>Shoulder, Arm, Elbow, Hand, Fingers</td><td>Y<sub>1</sub></td><td>N<sub>2</sub></td></tr> <tr><td>Torso/ Upper body<br/>Back, Neck, Ribs</td><td>Y<sub>1</sub></td><td>N<sub>2</sub></td></tr> <tr><td>Other (specify)</td><td>Y<sub>1</sub></td><td>N<sub>2</sub></td></tr> </table> | Lower Limbs<br>Hip, Knee, Leg, Ankle, Foot, Toes | Y <sub>1</sub> | N <sub>2</sub>                                                                                                                                                                                                                                                                                                                                                                                                                                                         | Upper Limbs<br>Shoulder, Arm, Elbow, Hand, Fingers | Y <sub>1</sub>                                                                                                                  | N <sub>2</sub> | Torso/ Upper body<br>Back, Neck, Ribs                                                                                                                                                                                                                                                                  | Y <sub>1</sub>     | N <sub>2</sub> | Other (specify)      | Y <sub>1</sub>             | N <sub>2</sub> | <table border="1"> <tr><td>Lower Limbs<br/>Hip, Knee, Leg, Ankle, Foot, Toes</td><td>Y<sub>1</sub></td><td>N<sub>2</sub></td></tr> <tr><td>Upper Limbs<br/>Shoulder, Arm, Elbow, Hand, Fingers</td><td>Y<sub>1</sub></td><td>N<sub>2</sub></td></tr> <tr><td>Torso/ Upper body<br/>Back, Neck, Ribs</td><td>Y<sub>1</sub></td><td>N<sub>2</sub></td></tr> <tr><td>Other (specify)</td><td>Y<sub>1</sub></td><td>N<sub>2</sub></td></tr> </table> | Lower Limbs<br>Hip, Knee, Leg, Ankle, Foot, Toes | Y <sub>1</sub> | N <sub>2</sub>  | Upper Limbs<br>Shoulder, Arm, Elbow, Hand, Fingers | Y <sub>1</sub> | N <sub>2</sub>                                                                                                                                                                                                                                                                                                                                                                                                                                                         | Torso/ Upper body<br>Back, Neck, Ribs | Y <sub>1</sub> | N <sub>2</sub> | Other (specify)                      | Y <sub>1</sub> | N <sub>2</sub> |                      |                |                |                          |                |                |                 |                |                |
| Lower Limbs<br>Hip, Knee, Leg, Ankle, Foot, Toes                                                                | Y <sub>1</sub>                                                                                                                                                                                                                                                                                                                                                                                                                                                         | N <sub>2</sub>                                   |                |                |                                                    |                |                |                                       |                |                                                                                                                                 |                                                                                                                                                                                                                                                                                                        |                    |                |                                                                                                                                                                                                                                                                                                                                                                                                                                                  |                                                  |                |                                                                                                                                                                                                                                                                                                                                                                                                                                                                        |                                                    |                                                                                                                                 |                |                                                                                                                                                                                                                                                                                                        |                    |                |                      |                            |                |                                                                                                                                                                                                                                                                                                                                                                                                                                                  |                                                  |                |                 |                                                    |                |                                                                                                                                                                                                                                                                                                                                                                                                                                                                        |                                       |                |                |                                      |                |                |                      |                |                |                          |                |                |                 |                |                |
| Upper Limbs<br>Shoulder, Arm, Elbow, Hand, Fingers                                                              | Y <sub>1</sub>                                                                                                                                                                                                                                                                                                                                                                                                                                                         | N <sub>2</sub>                                   |                |                |                                                    |                |                |                                       |                |                                                                                                                                 |                                                                                                                                                                                                                                                                                                        |                    |                |                                                                                                                                                                                                                                                                                                                                                                                                                                                  |                                                  |                |                                                                                                                                                                                                                                                                                                                                                                                                                                                                        |                                                    |                                                                                                                                 |                |                                                                                                                                                                                                                                                                                                        |                    |                |                      |                            |                |                                                                                                                                                                                                                                                                                                                                                                                                                                                  |                                                  |                |                 |                                                    |                |                                                                                                                                                                                                                                                                                                                                                                                                                                                                        |                                       |                |                |                                      |                |                |                      |                |                |                          |                |                |                 |                |                |
| Torso/ Upper body<br>Back, Neck, Ribs                                                                           | Y <sub>1</sub>                                                                                                                                                                                                                                                                                                                                                                                                                                                         | N <sub>2</sub>                                   |                |                |                                                    |                |                |                                       |                |                                                                                                                                 |                                                                                                                                                                                                                                                                                                        |                    |                |                                                                                                                                                                                                                                                                                                                                                                                                                                                  |                                                  |                |                                                                                                                                                                                                                                                                                                                                                                                                                                                                        |                                                    |                                                                                                                                 |                |                                                                                                                                                                                                                                                                                                        |                    |                |                      |                            |                |                                                                                                                                                                                                                                                                                                                                                                                                                                                  |                                                  |                |                 |                                                    |                |                                                                                                                                                                                                                                                                                                                                                                                                                                                                        |                                       |                |                |                                      |                |                |                      |                |                |                          |                |                |                 |                |                |
| Other (specify)                                                                                                 | Y <sub>1</sub>                                                                                                                                                                                                                                                                                                                                                                                                                                                         | N <sub>2</sub>                                   |                |                |                                                    |                |                |                                       |                |                                                                                                                                 |                                                                                                                                                                                                                                                                                                        |                    |                |                                                                                                                                                                                                                                                                                                                                                                                                                                                  |                                                  |                |                                                                                                                                                                                                                                                                                                                                                                                                                                                                        |                                                    |                                                                                                                                 |                |                                                                                                                                                                                                                                                                                                        |                    |                |                      |                            |                |                                                                                                                                                                                                                                                                                                                                                                                                                                                  |                                                  |                |                 |                                                    |                |                                                                                                                                                                                                                                                                                                                                                                                                                                                                        |                                       |                |                |                                      |                |                |                      |                |                |                          |                |                |                 |                |                |
| Lower Limbs<br>Hip, Knee, Leg, Ankle, Foot, Toes                                                                | Y <sub>1</sub>                                                                                                                                                                                                                                                                                                                                                                                                                                                         | N <sub>2</sub>                                   |                |                |                                                    |                |                |                                       |                |                                                                                                                                 |                                                                                                                                                                                                                                                                                                        |                    |                |                                                                                                                                                                                                                                                                                                                                                                                                                                                  |                                                  |                |                                                                                                                                                                                                                                                                                                                                                                                                                                                                        |                                                    |                                                                                                                                 |                |                                                                                                                                                                                                                                                                                                        |                    |                |                      |                            |                |                                                                                                                                                                                                                                                                                                                                                                                                                                                  |                                                  |                |                 |                                                    |                |                                                                                                                                                                                                                                                                                                                                                                                                                                                                        |                                       |                |                |                                      |                |                |                      |                |                |                          |                |                |                 |                |                |
| Upper Limbs<br>Shoulder, Arm, Elbow, Hand, Fingers                                                              | Y <sub>1</sub>                                                                                                                                                                                                                                                                                                                                                                                                                                                         | N <sub>2</sub>                                   |                |                |                                                    |                |                |                                       |                |                                                                                                                                 |                                                                                                                                                                                                                                                                                                        |                    |                |                                                                                                                                                                                                                                                                                                                                                                                                                                                  |                                                  |                |                                                                                                                                                                                                                                                                                                                                                                                                                                                                        |                                                    |                                                                                                                                 |                |                                                                                                                                                                                                                                                                                                        |                    |                |                      |                            |                |                                                                                                                                                                                                                                                                                                                                                                                                                                                  |                                                  |                |                 |                                                    |                |                                                                                                                                                                                                                                                                                                                                                                                                                                                                        |                                       |                |                |                                      |                |                |                      |                |                |                          |                |                |                 |                |                |
| Torso/ Upper body<br>Back, Neck, Ribs                                                                           | Y <sub>1</sub>                                                                                                                                                                                                                                                                                                                                                                                                                                                         | N <sub>2</sub>                                   |                |                |                                                    |                |                |                                       |                |                                                                                                                                 |                                                                                                                                                                                                                                                                                                        |                    |                |                                                                                                                                                                                                                                                                                                                                                                                                                                                  |                                                  |                |                                                                                                                                                                                                                                                                                                                                                                                                                                                                        |                                                    |                                                                                                                                 |                |                                                                                                                                                                                                                                                                                                        |                    |                |                      |                            |                |                                                                                                                                                                                                                                                                                                                                                                                                                                                  |                                                  |                |                 |                                                    |                |                                                                                                                                                                                                                                                                                                                                                                                                                                                                        |                                       |                |                |                                      |                |                |                      |                |                |                          |                |                |                 |                |                |
| Other (specify)                                                                                                 | Y <sub>1</sub>                                                                                                                                                                                                                                                                                                                                                                                                                                                         | N <sub>2</sub>                                   |                |                |                                                    |                |                |                                       |                |                                                                                                                                 |                                                                                                                                                                                                                                                                                                        |                    |                |                                                                                                                                                                                                                                                                                                                                                                                                                                                  |                                                  |                |                                                                                                                                                                                                                                                                                                                                                                                                                                                                        |                                                    |                                                                                                                                 |                |                                                                                                                                                                                                                                                                                                        |                    |                |                      |                            |                |                                                                                                                                                                                                                                                                                                                                                                                                                                                  |                                                  |                |                 |                                                    |                |                                                                                                                                                                                                                                                                                                                                                                                                                                                                        |                                       |                |                |                                      |                |                |                      |                |                |                          |                |                |                 |                |                |
| Lower Limbs<br>Hip, Knee, Leg, Ankle, Foot, Toes                                                                | Y <sub>1</sub>                                                                                                                                                                                                                                                                                                                                                                                                                                                         | N <sub>2</sub>                                   |                |                |                                                    |                |                |                                       |                |                                                                                                                                 |                                                                                                                                                                                                                                                                                                        |                    |                |                                                                                                                                                                                                                                                                                                                                                                                                                                                  |                                                  |                |                                                                                                                                                                                                                                                                                                                                                                                                                                                                        |                                                    |                                                                                                                                 |                |                                                                                                                                                                                                                                                                                                        |                    |                |                      |                            |                |                                                                                                                                                                                                                                                                                                                                                                                                                                                  |                                                  |                |                 |                                                    |                |                                                                                                                                                                                                                                                                                                                                                                                                                                                                        |                                       |                |                |                                      |                |                |                      |                |                |                          |                |                |                 |                |                |
| Upper Limbs<br>Shoulder, Arm, Elbow, Hand, Fingers                                                              | Y <sub>1</sub>                                                                                                                                                                                                                                                                                                                                                                                                                                                         | N <sub>2</sub>                                   |                |                |                                                    |                |                |                                       |                |                                                                                                                                 |                                                                                                                                                                                                                                                                                                        |                    |                |                                                                                                                                                                                                                                                                                                                                                                                                                                                  |                                                  |                |                                                                                                                                                                                                                                                                                                                                                                                                                                                                        |                                                    |                                                                                                                                 |                |                                                                                                                                                                                                                                                                                                        |                    |                |                      |                            |                |                                                                                                                                                                                                                                                                                                                                                                                                                                                  |                                                  |                |                 |                                                    |                |                                                                                                                                                                                                                                                                                                                                                                                                                                                                        |                                       |                |                |                                      |                |                |                      |                |                |                          |                |                |                 |                |                |
| Torso/ Upper body<br>Back, Neck, Ribs                                                                           | Y <sub>1</sub>                                                                                                                                                                                                                                                                                                                                                                                                                                                         | N <sub>2</sub>                                   |                |                |                                                    |                |                |                                       |                |                                                                                                                                 |                                                                                                                                                                                                                                                                                                        |                    |                |                                                                                                                                                                                                                                                                                                                                                                                                                                                  |                                                  |                |                                                                                                                                                                                                                                                                                                                                                                                                                                                                        |                                                    |                                                                                                                                 |                |                                                                                                                                                                                                                                                                                                        |                    |                |                      |                            |                |                                                                                                                                                                                                                                                                                                                                                                                                                                                  |                                                  |                |                 |                                                    |                |                                                                                                                                                                                                                                                                                                                                                                                                                                                                        |                                       |                |                |                                      |                |                |                      |                |                |                          |                |                |                 |                |                |
| Other (specify)                                                                                                 | Y <sub>1</sub>                                                                                                                                                                                                                                                                                                                                                                                                                                                         | N <sub>2</sub>                                   |                |                |                                                    |                |                |                                       |                |                                                                                                                                 |                                                                                                                                                                                                                                                                                                        |                    |                |                                                                                                                                                                                                                                                                                                                                                                                                                                                  |                                                  |                |                                                                                                                                                                                                                                                                                                                                                                                                                                                                        |                                                    |                                                                                                                                 |                |                                                                                                                                                                                                                                                                                                        |                    |                |                      |                            |                |                                                                                                                                                                                                                                                                                                                                                                                                                                                  |                                                  |                |                 |                                                    |                |                                                                                                                                                                                                                                                                                                                                                                                                                                                                        |                                       |                |                |                                      |                |                |                      |                |                |                          |                |                |                 |                |                |
| <b>Did this injury require...</b><br>Please circle Y/N on each line                                             | <table border="1"> <tr><td>Limitation of usual activities</td><td>Y<sub>1</sub></td><td>N<sub>2</sub></td></tr> <tr><td>Hospital treatment</td><td>Y<sub>1</sub></td><td>N<sub>2</sub></td></tr> <tr><td>Physiotherapy</td><td>Y<sub>1</sub></td><td>N<sub>2</sub></td></tr> <tr><td>Other treatment</td><td>Y<sub>1</sub></td><td>N<sub>2</sub></td></tr> </table>                                                                                                    | Limitation of usual activities                   | Y <sub>1</sub> | N <sub>2</sub> | Hospital treatment                                 | Y <sub>1</sub> | N <sub>2</sub> | Physiotherapy                         | Y <sub>1</sub> | N <sub>2</sub>                                                                                                                  | Other treatment                                                                                                                                                                                                                                                                                        | Y <sub>1</sub>     | N <sub>2</sub> | <table border="1"> <tr><td>Limitation of usual activities</td><td>Y<sub>1</sub></td><td>N<sub>2</sub></td></tr> <tr><td>Hospital treatment</td><td>Y<sub>1</sub></td><td>N<sub>2</sub></td></tr> <tr><td>Physiotherapy</td><td>Y<sub>1</sub></td><td>N<sub>2</sub></td></tr> <tr><td>Other treatment</td><td>Y<sub>1</sub></td><td>N<sub>2</sub></td></tr> </table>                                                                              | Limitation of usual activities                   | Y <sub>1</sub> | N <sub>2</sub>                                                                                                                                                                                                                                                                                                                                                                                                                                                         | Hospital treatment                                 | Y <sub>1</sub>                                                                                                                  | N <sub>2</sub> | Physiotherapy                                                                                                                                                                                                                                                                                          | Y <sub>1</sub>     | N <sub>2</sub> | Other treatment      | Y <sub>1</sub>             | N <sub>2</sub> | <table border="1"> <tr><td>Limitation of usual activities</td><td>Y<sub>1</sub></td><td>N<sub>2</sub></td></tr> <tr><td>Hospital treatment</td><td>Y<sub>1</sub></td><td>N<sub>2</sub></td></tr> <tr><td>Physiotherapy</td><td>Y<sub>1</sub></td><td>N<sub>2</sub></td></tr> <tr><td>Other treatment</td><td>Y<sub>1</sub></td><td>N<sub>2</sub></td></tr> </table>                                                                              | Limitation of usual activities                   | Y <sub>1</sub> | N <sub>2</sub>  | Hospital treatment                                 | Y <sub>1</sub> | N <sub>2</sub>                                                                                                                                                                                                                                                                                                                                                                                                                                                         | Physiotherapy                         | Y <sub>1</sub> | N <sub>2</sub> | Other treatment                      | Y <sub>1</sub> | N <sub>2</sub> |                      |                |                |                          |                |                |                 |                |                |
| Limitation of usual activities                                                                                  | Y <sub>1</sub>                                                                                                                                                                                                                                                                                                                                                                                                                                                         | N <sub>2</sub>                                   |                |                |                                                    |                |                |                                       |                |                                                                                                                                 |                                                                                                                                                                                                                                                                                                        |                    |                |                                                                                                                                                                                                                                                                                                                                                                                                                                                  |                                                  |                |                                                                                                                                                                                                                                                                                                                                                                                                                                                                        |                                                    |                                                                                                                                 |                |                                                                                                                                                                                                                                                                                                        |                    |                |                      |                            |                |                                                                                                                                                                                                                                                                                                                                                                                                                                                  |                                                  |                |                 |                                                    |                |                                                                                                                                                                                                                                                                                                                                                                                                                                                                        |                                       |                |                |                                      |                |                |                      |                |                |                          |                |                |                 |                |                |
| Hospital treatment                                                                                              | Y <sub>1</sub>                                                                                                                                                                                                                                                                                                                                                                                                                                                         | N <sub>2</sub>                                   |                |                |                                                    |                |                |                                       |                |                                                                                                                                 |                                                                                                                                                                                                                                                                                                        |                    |                |                                                                                                                                                                                                                                                                                                                                                                                                                                                  |                                                  |                |                                                                                                                                                                                                                                                                                                                                                                                                                                                                        |                                                    |                                                                                                                                 |                |                                                                                                                                                                                                                                                                                                        |                    |                |                      |                            |                |                                                                                                                                                                                                                                                                                                                                                                                                                                                  |                                                  |                |                 |                                                    |                |                                                                                                                                                                                                                                                                                                                                                                                                                                                                        |                                       |                |                |                                      |                |                |                      |                |                |                          |                |                |                 |                |                |
| Physiotherapy                                                                                                   | Y <sub>1</sub>                                                                                                                                                                                                                                                                                                                                                                                                                                                         | N <sub>2</sub>                                   |                |                |                                                    |                |                |                                       |                |                                                                                                                                 |                                                                                                                                                                                                                                                                                                        |                    |                |                                                                                                                                                                                                                                                                                                                                                                                                                                                  |                                                  |                |                                                                                                                                                                                                                                                                                                                                                                                                                                                                        |                                                    |                                                                                                                                 |                |                                                                                                                                                                                                                                                                                                        |                    |                |                      |                            |                |                                                                                                                                                                                                                                                                                                                                                                                                                                                  |                                                  |                |                 |                                                    |                |                                                                                                                                                                                                                                                                                                                                                                                                                                                                        |                                       |                |                |                                      |                |                |                      |                |                |                          |                |                |                 |                |                |
| Other treatment                                                                                                 | Y <sub>1</sub>                                                                                                                                                                                                                                                                                                                                                                                                                                                         | N <sub>2</sub>                                   |                |                |                                                    |                |                |                                       |                |                                                                                                                                 |                                                                                                                                                                                                                                                                                                        |                    |                |                                                                                                                                                                                                                                                                                                                                                                                                                                                  |                                                  |                |                                                                                                                                                                                                                                                                                                                                                                                                                                                                        |                                                    |                                                                                                                                 |                |                                                                                                                                                                                                                                                                                                        |                    |                |                      |                            |                |                                                                                                                                                                                                                                                                                                                                                                                                                                                  |                                                  |                |                 |                                                    |                |                                                                                                                                                                                                                                                                                                                                                                                                                                                                        |                                       |                |                |                                      |                |                |                      |                |                |                          |                |                |                 |                |                |
| Limitation of usual activities                                                                                  | Y <sub>1</sub>                                                                                                                                                                                                                                                                                                                                                                                                                                                         | N <sub>2</sub>                                   |                |                |                                                    |                |                |                                       |                |                                                                                                                                 |                                                                                                                                                                                                                                                                                                        |                    |                |                                                                                                                                                                                                                                                                                                                                                                                                                                                  |                                                  |                |                                                                                                                                                                                                                                                                                                                                                                                                                                                                        |                                                    |                                                                                                                                 |                |                                                                                                                                                                                                                                                                                                        |                    |                |                      |                            |                |                                                                                                                                                                                                                                                                                                                                                                                                                                                  |                                                  |                |                 |                                                    |                |                                                                                                                                                                                                                                                                                                                                                                                                                                                                        |                                       |                |                |                                      |                |                |                      |                |                |                          |                |                |                 |                |                |
| Hospital treatment                                                                                              | Y <sub>1</sub>                                                                                                                                                                                                                                                                                                                                                                                                                                                         | N <sub>2</sub>                                   |                |                |                                                    |                |                |                                       |                |                                                                                                                                 |                                                                                                                                                                                                                                                                                                        |                    |                |                                                                                                                                                                                                                                                                                                                                                                                                                                                  |                                                  |                |                                                                                                                                                                                                                                                                                                                                                                                                                                                                        |                                                    |                                                                                                                                 |                |                                                                                                                                                                                                                                                                                                        |                    |                |                      |                            |                |                                                                                                                                                                                                                                                                                                                                                                                                                                                  |                                                  |                |                 |                                                    |                |                                                                                                                                                                                                                                                                                                                                                                                                                                                                        |                                       |                |                |                                      |                |                |                      |                |                |                          |                |                |                 |                |                |
| Physiotherapy                                                                                                   | Y <sub>1</sub>                                                                                                                                                                                                                                                                                                                                                                                                                                                         | N <sub>2</sub>                                   |                |                |                                                    |                |                |                                       |                |                                                                                                                                 |                                                                                                                                                                                                                                                                                                        |                    |                |                                                                                                                                                                                                                                                                                                                                                                                                                                                  |                                                  |                |                                                                                                                                                                                                                                                                                                                                                                                                                                                                        |                                                    |                                                                                                                                 |                |                                                                                                                                                                                                                                                                                                        |                    |                |                      |                            |                |                                                                                                                                                                                                                                                                                                                                                                                                                                                  |                                                  |                |                 |                                                    |                |                                                                                                                                                                                                                                                                                                                                                                                                                                                                        |                                       |                |                |                                      |                |                |                      |                |                |                          |                |                |                 |                |                |
| Other treatment                                                                                                 | Y <sub>1</sub>                                                                                                                                                                                                                                                                                                                                                                                                                                                         | N <sub>2</sub>                                   |                |                |                                                    |                |                |                                       |                |                                                                                                                                 |                                                                                                                                                                                                                                                                                                        |                    |                |                                                                                                                                                                                                                                                                                                                                                                                                                                                  |                                                  |                |                                                                                                                                                                                                                                                                                                                                                                                                                                                                        |                                                    |                                                                                                                                 |                |                                                                                                                                                                                                                                                                                                        |                    |                |                      |                            |                |                                                                                                                                                                                                                                                                                                                                                                                                                                                  |                                                  |                |                 |                                                    |                |                                                                                                                                                                                                                                                                                                                                                                                                                                                                        |                                       |                |                |                                      |                |                |                      |                |                |                          |                |                |                 |                |                |
| Limitation of usual activities                                                                                  | Y <sub>1</sub>                                                                                                                                                                                                                                                                                                                                                                                                                                                         | N <sub>2</sub>                                   |                |                |                                                    |                |                |                                       |                |                                                                                                                                 |                                                                                                                                                                                                                                                                                                        |                    |                |                                                                                                                                                                                                                                                                                                                                                                                                                                                  |                                                  |                |                                                                                                                                                                                                                                                                                                                                                                                                                                                                        |                                                    |                                                                                                                                 |                |                                                                                                                                                                                                                                                                                                        |                    |                |                      |                            |                |                                                                                                                                                                                                                                                                                                                                                                                                                                                  |                                                  |                |                 |                                                    |                |                                                                                                                                                                                                                                                                                                                                                                                                                                                                        |                                       |                |                |                                      |                |                |                      |                |                |                          |                |                |                 |                |                |
| Hospital treatment                                                                                              | Y <sub>1</sub>                                                                                                                                                                                                                                                                                                                                                                                                                                                         | N <sub>2</sub>                                   |                |                |                                                    |                |                |                                       |                |                                                                                                                                 |                                                                                                                                                                                                                                                                                                        |                    |                |                                                                                                                                                                                                                                                                                                                                                                                                                                                  |                                                  |                |                                                                                                                                                                                                                                                                                                                                                                                                                                                                        |                                                    |                                                                                                                                 |                |                                                                                                                                                                                                                                                                                                        |                    |                |                      |                            |                |                                                                                                                                                                                                                                                                                                                                                                                                                                                  |                                                  |                |                 |                                                    |                |                                                                                                                                                                                                                                                                                                                                                                                                                                                                        |                                       |                |                |                                      |                |                |                      |                |                |                          |                |                |                 |                |                |
| Physiotherapy                                                                                                   | Y <sub>1</sub>                                                                                                                                                                                                                                                                                                                                                                                                                                                         | N <sub>2</sub>                                   |                |                |                                                    |                |                |                                       |                |                                                                                                                                 |                                                                                                                                                                                                                                                                                                        |                    |                |                                                                                                                                                                                                                                                                                                                                                                                                                                                  |                                                  |                |                                                                                                                                                                                                                                                                                                                                                                                                                                                                        |                                                    |                                                                                                                                 |                |                                                                                                                                                                                                                                                                                                        |                    |                |                      |                            |                |                                                                                                                                                                                                                                                                                                                                                                                                                                                  |                                                  |                |                 |                                                    |                |                                                                                                                                                                                                                                                                                                                                                                                                                                                                        |                                       |                |                |                                      |                |                |                      |                |                |                          |                |                |                 |                |                |
| Other treatment                                                                                                 | Y <sub>1</sub>                                                                                                                                                                                                                                                                                                                                                                                                                                                         | N <sub>2</sub>                                   |                |                |                                                    |                |                |                                       |                |                                                                                                                                 |                                                                                                                                                                                                                                                                                                        |                    |                |                                                                                                                                                                                                                                                                                                                                                                                                                                                  |                                                  |                |                                                                                                                                                                                                                                                                                                                                                                                                                                                                        |                                                    |                                                                                                                                 |                |                                                                                                                                                                                                                                                                                                        |                    |                |                      |                            |                |                                                                                                                                                                                                                                                                                                                                                                                                                                                  |                                                  |                |                 |                                                    |                |                                                                                                                                                                                                                                                                                                                                                                                                                                                                        |                                       |                |                |                                      |                |                |                      |                |                |                          |                |                |                 |                |                |
| <b>To what extent does this injury still limit your day to day activities</b><br>Please circle Y/N on each line | <table border="1"> <tr><td>Difficulty walking</td><td>Y<sub>1</sub></td><td>N<sub>2</sub></td></tr> <tr><td>Difficulty climbing stairs</td><td>Y<sub>1</sub></td><td>N<sub>2</sub></td></tr> <tr><td>Difficulty doing physical activity</td><td>Y<sub>1</sub></td><td>N<sub>2</sub></td></tr> </table>                                                                                                                                                                 | Difficulty walking                               | Y <sub>1</sub> | N <sub>2</sub> | Difficulty climbing stairs                         | Y <sub>1</sub> | N <sub>2</sub> | Difficulty doing physical activity    | Y <sub>1</sub> | N <sub>2</sub>                                                                                                                  | <table border="1"> <tr><td>Difficulty walking</td><td>Y<sub>1</sub></td><td>N<sub>2</sub></td></tr> <tr><td>Difficulty climbing stairs</td><td>Y<sub>1</sub></td><td>N<sub>2</sub></td></tr> <tr><td>Difficulty doing physical activity</td><td>Y<sub>1</sub></td><td>N<sub>2</sub></td></tr> </table> | Difficulty walking | Y <sub>1</sub> | N <sub>2</sub>                                                                                                                                                                                                                                                                                                                                                                                                                                   | Difficulty climbing stairs                       | Y <sub>1</sub> | N <sub>2</sub>                                                                                                                                                                                                                                                                                                                                                                                                                                                         | Difficulty doing physical activity                 | Y <sub>1</sub>                                                                                                                  | N <sub>2</sub> | <table border="1"> <tr><td>Difficulty walking</td><td>Y<sub>1</sub></td><td>N<sub>2</sub></td></tr> <tr><td>Difficulty climbing stairs</td><td>Y<sub>1</sub></td><td>N<sub>2</sub></td></tr> <tr><td>Difficulty doing physical activity</td><td>Y<sub>1</sub></td><td>N<sub>2</sub></td></tr> </table> | Difficulty walking | Y <sub>1</sub> | N <sub>2</sub>       | Difficulty climbing stairs | Y <sub>1</sub> | N <sub>2</sub>                                                                                                                                                                                                                                                                                                                                                                                                                                   | Difficulty doing physical activity               | Y <sub>1</sub> | N <sub>2</sub>  |                                                    |                |                                                                                                                                                                                                                                                                                                                                                                                                                                                                        |                                       |                |                |                                      |                |                |                      |                |                |                          |                |                |                 |                |                |
| Difficulty walking                                                                                              | Y <sub>1</sub>                                                                                                                                                                                                                                                                                                                                                                                                                                                         | N <sub>2</sub>                                   |                |                |                                                    |                |                |                                       |                |                                                                                                                                 |                                                                                                                                                                                                                                                                                                        |                    |                |                                                                                                                                                                                                                                                                                                                                                                                                                                                  |                                                  |                |                                                                                                                                                                                                                                                                                                                                                                                                                                                                        |                                                    |                                                                                                                                 |                |                                                                                                                                                                                                                                                                                                        |                    |                |                      |                            |                |                                                                                                                                                                                                                                                                                                                                                                                                                                                  |                                                  |                |                 |                                                    |                |                                                                                                                                                                                                                                                                                                                                                                                                                                                                        |                                       |                |                |                                      |                |                |                      |                |                |                          |                |                |                 |                |                |
| Difficulty climbing stairs                                                                                      | Y <sub>1</sub>                                                                                                                                                                                                                                                                                                                                                                                                                                                         | N <sub>2</sub>                                   |                |                |                                                    |                |                |                                       |                |                                                                                                                                 |                                                                                                                                                                                                                                                                                                        |                    |                |                                                                                                                                                                                                                                                                                                                                                                                                                                                  |                                                  |                |                                                                                                                                                                                                                                                                                                                                                                                                                                                                        |                                                    |                                                                                                                                 |                |                                                                                                                                                                                                                                                                                                        |                    |                |                      |                            |                |                                                                                                                                                                                                                                                                                                                                                                                                                                                  |                                                  |                |                 |                                                    |                |                                                                                                                                                                                                                                                                                                                                                                                                                                                                        |                                       |                |                |                                      |                |                |                      |                |                |                          |                |                |                 |                |                |
| Difficulty doing physical activity                                                                              | Y <sub>1</sub>                                                                                                                                                                                                                                                                                                                                                                                                                                                         | N <sub>2</sub>                                   |                |                |                                                    |                |                |                                       |                |                                                                                                                                 |                                                                                                                                                                                                                                                                                                        |                    |                |                                                                                                                                                                                                                                                                                                                                                                                                                                                  |                                                  |                |                                                                                                                                                                                                                                                                                                                                                                                                                                                                        |                                                    |                                                                                                                                 |                |                                                                                                                                                                                                                                                                                                        |                    |                |                      |                            |                |                                                                                                                                                                                                                                                                                                                                                                                                                                                  |                                                  |                |                 |                                                    |                |                                                                                                                                                                                                                                                                                                                                                                                                                                                                        |                                       |                |                |                                      |                |                |                      |                |                |                          |                |                |                 |                |                |
| Difficulty walking                                                                                              | Y <sub>1</sub>                                                                                                                                                                                                                                                                                                                                                                                                                                                         | N <sub>2</sub>                                   |                |                |                                                    |                |                |                                       |                |                                                                                                                                 |                                                                                                                                                                                                                                                                                                        |                    |                |                                                                                                                                                                                                                                                                                                                                                                                                                                                  |                                                  |                |                                                                                                                                                                                                                                                                                                                                                                                                                                                                        |                                                    |                                                                                                                                 |                |                                                                                                                                                                                                                                                                                                        |                    |                |                      |                            |                |                                                                                                                                                                                                                                                                                                                                                                                                                                                  |                                                  |                |                 |                                                    |                |                                                                                                                                                                                                                                                                                                                                                                                                                                                                        |                                       |                |                |                                      |                |                |                      |                |                |                          |                |                |                 |                |                |
| Difficulty climbing stairs                                                                                      | Y <sub>1</sub>                                                                                                                                                                                                                                                                                                                                                                                                                                                         | N <sub>2</sub>                                   |                |                |                                                    |                |                |                                       |                |                                                                                                                                 |                                                                                                                                                                                                                                                                                                        |                    |                |                                                                                                                                                                                                                                                                                                                                                                                                                                                  |                                                  |                |                                                                                                                                                                                                                                                                                                                                                                                                                                                                        |                                                    |                                                                                                                                 |                |                                                                                                                                                                                                                                                                                                        |                    |                |                      |                            |                |                                                                                                                                                                                                                                                                                                                                                                                                                                                  |                                                  |                |                 |                                                    |                |                                                                                                                                                                                                                                                                                                                                                                                                                                                                        |                                       |                |                |                                      |                |                |                      |                |                |                          |                |                |                 |                |                |
| Difficulty doing physical activity                                                                              | Y <sub>1</sub>                                                                                                                                                                                                                                                                                                                                                                                                                                                         | N <sub>2</sub>                                   |                |                |                                                    |                |                |                                       |                |                                                                                                                                 |                                                                                                                                                                                                                                                                                                        |                    |                |                                                                                                                                                                                                                                                                                                                                                                                                                                                  |                                                  |                |                                                                                                                                                                                                                                                                                                                                                                                                                                                                        |                                                    |                                                                                                                                 |                |                                                                                                                                                                                                                                                                                                        |                    |                |                      |                            |                |                                                                                                                                                                                                                                                                                                                                                                                                                                                  |                                                  |                |                 |                                                    |                |                                                                                                                                                                                                                                                                                                                                                                                                                                                                        |                                       |                |                |                                      |                |                |                      |                |                |                          |                |                |                 |                |                |
| Difficulty walking                                                                                              | Y <sub>1</sub>                                                                                                                                                                                                                                                                                                                                                                                                                                                         | N <sub>2</sub>                                   |                |                |                                                    |                |                |                                       |                |                                                                                                                                 |                                                                                                                                                                                                                                                                                                        |                    |                |                                                                                                                                                                                                                                                                                                                                                                                                                                                  |                                                  |                |                                                                                                                                                                                                                                                                                                                                                                                                                                                                        |                                                    |                                                                                                                                 |                |                                                                                                                                                                                                                                                                                                        |                    |                |                      |                            |                |                                                                                                                                                                                                                                                                                                                                                                                                                                                  |                                                  |                |                 |                                                    |                |                                                                                                                                                                                                                                                                                                                                                                                                                                                                        |                                       |                |                |                                      |                |                |                      |                |                |                          |                |                |                 |                |                |
| Difficulty climbing stairs                                                                                      | Y <sub>1</sub>                                                                                                                                                                                                                                                                                                                                                                                                                                                         | N <sub>2</sub>                                   |                |                |                                                    |                |                |                                       |                |                                                                                                                                 |                                                                                                                                                                                                                                                                                                        |                    |                |                                                                                                                                                                                                                                                                                                                                                                                                                                                  |                                                  |                |                                                                                                                                                                                                                                                                                                                                                                                                                                                                        |                                                    |                                                                                                                                 |                |                                                                                                                                                                                                                                                                                                        |                    |                |                      |                            |                |                                                                                                                                                                                                                                                                                                                                                                                                                                                  |                                                  |                |                 |                                                    |                |                                                                                                                                                                                                                                                                                                                                                                                                                                                                        |                                       |                |                |                                      |                |                |                      |                |                |                          |                |                |                 |                |                |
| Difficulty doing physical activity                                                                              | Y <sub>1</sub>                                                                                                                                                                                                                                                                                                                                                                                                                                                         | N <sub>2</sub>                                   |                |                |                                                    |                |                |                                       |                |                                                                                                                                 |                                                                                                                                                                                                                                                                                                        |                    |                |                                                                                                                                                                                                                                                                                                                                                                                                                                                  |                                                  |                |                                                                                                                                                                                                                                                                                                                                                                                                                                                                        |                                                    |                                                                                                                                 |                |                                                                                                                                                                                                                                                                                                        |                    |                |                      |                            |                |                                                                                                                                                                                                                                                                                                                                                                                                                                                  |                                                  |                |                 |                                                    |                |                                                                                                                                                                                                                                                                                                                                                                                                                                                                        |                                       |                |                |                                      |                |                |                      |                |                |                          |                |                |                 |                |                |



# 38 JOINT PAIN

| 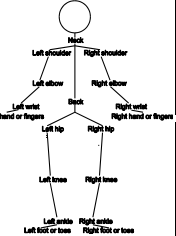 | Pain frequency                          |                        |       |            | Pain severity                                             |                                                           |          |        | Limit to activities                              |   |                   |             |                      |               |               |            |   |
|-----------------------------------------------------------------------------------|-----------------------------------------|------------------------|-------|------------|-----------------------------------------------------------|-----------------------------------------------------------|----------|--------|--------------------------------------------------|---|-------------------|-------------|----------------------|---------------|---------------|------------|---|
|                                                                                   | "How often do you get pain in your...?" |                        |       |            | "Is the pain...?"                                         |                                                           |          |        | "Does this limit your day to day activities...?" |   |                   |             |                      |               |               |            |   |
|                                                                                   | All or most of the time                 | Only from time to time | Never | Don't Know |                                                           | Severe                                                    | Moderate | Slight | Don't know                                       |   | A very great deal | Quite a lot | To a moderate degree | Only a little | Or not at all | Don't know |   |
| Neck                                                                              | 1                                       | 2                      | 3     | 9          | → complete severity & limits if freq. answer is 1, 2 or 9 | 1                                                         | 2        | 3      | 9                                                |   | 1                 | 2           | 3                    | 4             | 5             | 9          |   |
| Back                                                                              | 1                                       | 2                      | 3     | 9          |                                                           | 1                                                         | 2        | 3      | 9                                                |   | 1                 | 2           | 3                    | 4             | 5             | 9          |   |
| Shoulder                                                                          | L                                       | 1                      | 2     | 3          | 9                                                         | → complete severity & limits if freq. answer is 1, 2 or 9 | 1        | 2      | 3                                                | 9 |                   | 1           | 2                    | 3             | 4             | 5          | 9 |
|                                                                                   | R                                       | 1                      | 2     | 3          | 9                                                         |                                                           | 1        | 2      | 3                                                | 9 |                   | 1           | 2                    | 3             | 4             | 5          | 9 |
| Elbow                                                                             | L                                       | 1                      | 2     | 3          | 9                                                         | → complete severity & limits if freq. answer is 1, 2 or 9 | 1        | 2      | 3                                                | 9 |                   | 1           | 2                    | 3             | 4             | 5          | 9 |
|                                                                                   | R                                       | 1                      | 2     | 3          | 9                                                         |                                                           | 1        | 2      | 3                                                | 9 |                   | 1           | 2                    | 3             | 4             | 5          | 9 |
| Wrist                                                                             | L                                       | 1                      | 2     | 3          | 9                                                         | → severity & limits if freq. answer is 1, 2 or 9          | 1        | 2      | 3                                                | 9 |                   | 1           | 2                    | 3             | 4             | 5          | 9 |
|                                                                                   | R                                       | 1                      | 2     | 3          | 9                                                         |                                                           | 1        | 2      | 3                                                | 9 |                   | 1           | 2                    | 3             | 4             | 5          | 9 |
| Hand/<br>Finger                                                                   | L                                       | 1                      | 2     | 3          | 9                                                         | → complete severity & limits if freq. answer is 1, 2 or 9 | 1        | 2      | 3                                                | 9 |                   | 1           | 2                    | 3             | 4             | 5          | 9 |
|                                                                                   | R                                       | 1                      | 2     | 3          | 9                                                         |                                                           | 1        | 2      | 3                                                | 9 |                   | 1           | 2                    | 3             | 4             | 5          | 9 |
| Hip                                                                               | L                                       | 1                      | 2     | 3          | 9                                                         | → complete severity & limits if freq. answer is 1, 2 or 9 | 1        | 2      | 3                                                | 9 |                   | 1           | 2                    | 3             | 4             | 5          | 9 |
|                                                                                   | R                                       | 1                      | 2     | 3          | 9                                                         |                                                           | 1        | 2      | 3                                                | 9 |                   | 1           | 2                    | 3             | 4             | 5          | 9 |
| Knee                                                                              | L                                       | 1                      | 2     | 3          | 9                                                         | → complete severity & limits if freq. answer is 1, 2 or 9 | 1        | 2      | 3                                                | 9 |                   | 1           | 2                    | 3             | 4             | 5          | 9 |
|                                                                                   | R                                       | 1                      | 2     | 3          | 9                                                         |                                                           | 1        | 2      | 3                                                | 9 |                   | 1           | 2                    | 3             | 4             | 5          | 9 |
| Ankle                                                                             | L                                       | 1                      | 2     | 3          | 9                                                         | → complete severity & limits if freq. answer is 1, 2 or 9 | 1        | 2      | 3                                                | 9 |                   | 1           | 2                    | 3             | 4             | 5          | 9 |
|                                                                                   | R                                       | 1                      | 2     | 3          | 9                                                         |                                                           | 1        | 2      | 3                                                | 9 |                   | 1           | 2                    | 3             | 4             | 5          | 9 |
| Foot<br>/ Toes                                                                    | L                                       | 1                      | 2     | 3          | 9                                                         | → complete severity & limits if freq. answer is 1, 2 or 9 | 1        | 2      | 3                                                | 9 |                   | 1           | 2                    | 3             | 4             | 5          | 9 |
|                                                                                   | R                                       | 1                      | 2     | 3          | 9                                                         |                                                           | 1        | 2      | 3                                                | 9 |                   | 1           | 2                    | 3             | 4             | 5          | 9 |

# THANK MAN FOR COMPLETING THIS QUESTIONNAIRE

## QUESTIONNAIRE CHECK

|                                   | IDNO                                                           | INITIALS |  |  |                                                                |  |  |  |
|-----------------------------------|----------------------------------------------------------------|----------|--|--|----------------------------------------------------------------|--|--|--|
| <b>Questionnaire</b><br>(Checker) | <table border="1"><tr><td></td><td></td><td></td></tr></table> |          |  |  | <table border="1"><tr><td></td><td></td><td></td></tr></table> |  |  |  |
|                                   |                                                                |          |  |  |                                                                |  |  |  |
|                                   |                                                                |          |  |  |                                                                |  |  |  |
| <b>S A H R</b><br>(Completer)     | <table border="1"><tr><td></td><td></td><td></td></tr></table> |          |  |  | <table border="1"><tr><td></td><td></td><td></td></tr></table> |  |  |  |
|                                   |                                                                |          |  |  |                                                                |  |  |  |
|                                   |                                                                |          |  |  |                                                                |  |  |  |

# MEASUREMENTS

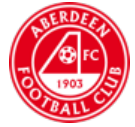

## DATE

|  |  |   |  |   |  |  |
|--|--|---|--|---|--|--|
|  |  | / |  | / |  |  |
|--|--|---|--|---|--|--|

## BLOOD PRESSURE

### TEMPERATURE

|  |  |   |  |   |                  |     |    |                                |  |
|--|--|---|--|---|------------------|-----|----|--------------------------------|--|
|  |  | . |  | ° |                  |     |    |                                |  |
|  |  |   |  | C | SITTING 5 MINS?  | YES | NO | SURVEY ASST.<br>IDNO/ INITIALS |  |
|  |  |   |  |   | BP LETTER GIVEN? | YES | NO |                                |  |

*If SYSTOLIC over 150 or DIASTOLIC over 90, issue BP letter*

| SYSTOLIC | DIASTOLIC | PULSE | ARM | OMRON ID | CUFF ID |
|----------|-----------|-------|-----|----------|---------|
|          |           |       |     |          |         |
|          |           |       |     |          |         |

If any problems with first reading – record again and state issue with first reading below.

|  |  |  |  |  |  |
|--|--|--|--|--|--|
|  |  |  |  |  |  |
|--|--|--|--|--|--|

**IF MEASUREMENT NOT TAKEN OR ANY ISSUES - PLEASE RECORD HERE**

## WAIST

| WAIST | SURVEY ASST.<br>IDNO/ INITIALS |
|-------|--------------------------------|
| 1     |                                |
| 2     |                                |
| 3     |                                |

If difference between measures 1 and 2 is  $\geq 0.5\text{cm}$ , record 3rd measure

**IF MEASUREMENT NOT TAKEN OR ANY ISSUES - PLEASE RECORD HERE**

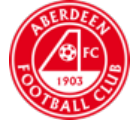

## HEIGHT

|  |  |  |   |  |     |
|--|--|--|---|--|-----|
|  |  |  | . |  | CMS |
|--|--|--|---|--|-----|

|                     |                                |
|---------------------|--------------------------------|
| STADIOMETER<br>IDNO | SURVEY ASST.<br>IDNO/ INITIALS |
|                     |                                |

IF MEASUREMENT NOT TAKEN OR ANY ISSUES (esp. balance, posture, wearing turban etc) - PLEASE RECORD HERE

## WEIGHT

|  |  |  |   |  |     |
|--|--|--|---|--|-----|
|  |  |  | . |  | KGS |
|--|--|--|---|--|-----|

|             |                                |
|-------------|--------------------------------|
| SCALES IDNO | SURVEY ASST.<br>IDNO/ INITIALS |
|             |                                |

IF MEASUREMENT NOT TAKEN OR ANY ISSUES - PLEASE RECORD HERE

***DOCUMENT ENDS***
